# Supplementary material for: Addressing incomplete lineage sorting and paralogy in the inference of uncertain salmonid phylogenetic relationships
Source: PeerJ. 2020 Jul 3;8:e9389. doi: 10.7717/peerj.9389 (PMC7337038; doi:10.7717/peerj.9389)
Supplement: Supplemental Information 3 — The classification of taxa examined in this study are given to Family for outgroups and subfamily for Salmoniformes. Previously reported assemblies from Campbell et al. (2017) and Faircloth et al. (2013) are indicated as well as the number of UCE loci retained after filtering for UCE loci matching multiple contigs and contigs matching muliple UCE loci. [file peerj-08-9389-s003.xlsx]

## Sheet: Sheet1
Supplemental Table S1: The classification of taxa examined in this study are given to Family for outgroups and subfamily for Salmoniformes. Previously reported assemblies from Campbell et al. (2017) and Faircloth et al. (2013) are indicated as well as the number of UCE loci retained after filtering for UCE loci matching multiple contigs and contigs matching muliple UCE loci.
For assemblies, the average length of contigs matching UCE probes and average coverage from the Velvet assembler are given, with the optimal kmer if known.
	Order	Family	Subfamily	Genus/species	Tissue ID if Available		Previously Reported Assembly?		Number of UCE Loci Retained	Number of Loci Removed for Loci Matching Multiple Contigs	Number of Contigs Removed for Matching Multiple UCE Loci	Average Length of Contigs Matching UCE Probes	Average Coverage of Contigs Matching UCE Probes	Optimal Kmer
	Esociformes	Esocidae		Esox lucius	UA 155331		Campbell et al. (2017)		415	40	6	446.59	33.45	61
				Umbra limi			Faircloth et al. (2013)		409	32	4	434.82	69.39	-
	Salmoniformes	Salmonidae	Coregoninae	Coregonus pidschian			Campbell et al. (2017)		226	110	5	324.24	9.65	73
				Coregonus laurettae					275	74	5	251.95	9.28	57
				Coregonus sardinella					225	147	6	328.97	11.21	71
				Stenodus leucichthys					256	79	5	255.35	13.49	57
				Prosopium cylindraceum					272	135	4	321.78	37.48	59
			Salmoninae	Brachymystax lenok					198	183	6	379.42	52.48	79
				Hucho taimen					213	168	7	331.03	14.33	75
				Oncorhynchus tshawytscha					243	123	4	335.18	42.08	73
				Oncorhynchus mykiss					219	152	8	419.02	42.79	73
				Parahucho perryi			Campbell et al. (2017)		216	163	6	397.4	43.46	73
				Salvelinus alpinus					219	141	7	373.57	33.6	75
				Salvelinus fontinalis			Faircloth et al. (2013)		166	267	8	346.79	49.1	-
				Salmo salar					210	200	7	332.53	53.35	75
			Thymallinae	Thymallus arcticus			Campbell et al. (2017)		230	67	3	300.43	25.52	59
				Thymallus grubii					198	210	6	367.57	50.95	77
					KU_05365
