# Supplementary material for: Addressing incomplete lineage sorting and paralogy in the inference of uncertain salmonid phylogenetic relationships
Source: PeerJ. 2020 Jul 3;8:e9389. doi: 10.7717/peerj.9389 (PMC7337038; doi:10.7717/peerj.9389)
Supplement: Supplemental Information 4 — Preferred DNA sequence evolution model for each UCE locus in the study is presented. [file peerj-08-9389-s004.xlsx]

## Sheet: 100%
UCE	Model
uce-120	K80+I
uce-191	K80+I
uce-251	HKY+G
uce-280	HKY+I
uce-305	F81
uce-444	K80+G

## Sheet: 95%
UCE	Model
uce-120	K80+I
uce-175	HKY
uce-191	K80+I
uce-251	HKY+G
uce-280	HKY+I
uce-305	F81
uce-383	JC+I
uce-444	K80+G
uce-459	HKY+G
uce-717	F81+G
uce-781	JC+G
uce-1113	K80+I
uce-1238	HKY+G

## Sheet: 93%
UCE	Model
uce-120	K80+I
uce-175	HKY
uce-191	K80+I
uce-251	HKY+G
uce-280	HKY+I
uce-305	F81
uce-383	JC+I
uce-444	K80+G
uce-459	HKY+G
uce-717	F81+G
uce-781	JC+G
uce-1113	K80+I
uce-1238	HKY+G
uce-167	JC+I
uce-233	HKY+I
uce-276	TVMef+G
uce-367	K80+G
uce-474	TrNef+G
uce-607	K80+G
uce-609	HKY+I
uce-622	JC
uce-660	HKY+I
uce-948	JC
uce-1007	K80+I
uce-1064	TrNef
uce-1260	K80+G
uce-1279	K81+I
uce-1338	K80

## Sheet: 75%
Locus	Model
uce-1007	K80+I
uce-103	K80+G
uce-1032	K80+I
uce-1040	JC
uce-1053	K80+G
uce-1064	TrNef
uce-1087	HKY+G
uce-1097	HKY
uce-1113	K80+I
uce-116	HKY+I
uce-1175	JC
uce-1184	K80
uce-120	K80+I
uce-1200	K80+I
uce-1238	HKY+G
uce-1256	HKY+G
uce-1260	K80+G
uce-1279	K81+I
uce-1281	K80
uce-13	TrN
uce-1324	HKY+G
uce-1338	K80
uce-151	K80+G
uce-160	HKY+G
uce-167	JC+I
uce-175	HKY
uce-183	TrN
uce-185	K80
uce-191	K80+I
uce-194	K80
uce-196	JC+I
uce-201	K80+G
uce-215	HKY+G
uce-227	JC
uce-233	HKY+I
uce-249	TrNef+G
uce-25	HKY
uce-251	HKY+G
uce-267	JC
uce-276	TVMef+G
uce-280	HKY+I
uce-282	K80
uce-3	HKY
uce-305	F81
uce-310	F81+G
uce-319	K80+G
uce-327	TrN+G
uce-331	K80+G
uce-338	HKY+I
uce-34	F81
uce-359	HKY+G
uce-367	K80+G
uce-376	JC
uce-383	JC+I
uce-413	K80+G
uce-444	K80+G
uce-450	K80
uce-459	HKY+G
uce-467	K80
uce-469	K81uf+G
uce-47	F81+G
uce-474	TrNef+G
uce-494	K80+G
uce-496	HKY+G
uce-508	K81+G
uce-51	JC+I
uce-510	K80+G
uce-529	K80
uce-537	HKY
uce-54	TrN+G
uce-546	K80
uce-547	K80+I
uce-549	K80+I
uce-567	K80+G
uce-570	HKY
uce-585	K80+G
uce-597	K80+G
uce-605	K80
uce-607	K80+G
uce-609	HKY+I
uce-612	HKY+G
uce-622	JC
uce-63	K80+I
uce-660	HKY+I
uce-691	TrNef+I
uce-696	JC+I
uce-701	HKY+I
uce-717	F81+G
uce-718	F81+G
uce-73	K80+G
uce-750	K80
uce-769	TrNef+G
uce-781	JC+G
uce-808	K81uf+I
uce-830	K80+G
uce-879	K80+G
uce-894	HKY+G
uce-901	HKY+G
uce-915	JC+I
uce-920	TrN
uce-943	HKY+G
uce-948	JC
uce-982	F81+G
uce-987	K80+G
uce-99	F81+G
