# Supplementary material for: Addressing incomplete lineage sorting and paralogy in the inference of uncertain salmonid phylogenetic relationships
Source: PeerJ. 2020 Jul 3;8:e9389. doi: 10.7717/peerj.9389 (PMC7337038; doi:10.7717/peerj.9389)
Supplement: Supplemental Information 5 — For the concatenated analyses in this study support values for key relationships are presented along with results of hypothesis testing. [file peerj-08-9389-s005.xlsx]

## Sheet: Concatenated Results
Concatenated Analyses	Partitioning / Modelling Scheme	Number of Partitions	Sister Subfamilies	Sister Subfamilies Bootstrap Support	Monophyly of Coregonus?	Support for Monophyly of Coregonus	Sister of Parahucho	Support for Sister of Parhucho		Highest Ranked Topology	Second Ranked Topology	AU p - value	Third Ranked Topology	AU p - value	Bold indicates p-value < 0.05
100% Coverage Alignment	Unpartitioned	1	Coregoninae + Salmoninae	0.67	Yes	0.9	Salmo	0.76		Coregoninae + Salmoninae	Salmoninae + Thymallinae	0.447	Coregoninae + Thymallinae	0.145
	By UCE	6	Coregoninae + Salmoninae	1	Yes	1	Salmo	1		Coregoninae + Salmoninae	Salmoninae + Thymallinae	0.447	Coregoninae + Thymallinae	0.145
	"greedy"	1	-	-	-
95% Coverage Alignment	Unpartitioned	1	Coregoninae + Salmoninae	0.36	No	-	Salmo	0.66		Salmoninae + Thymallinae	Coregoninae + Salmoninae	0.547	Coregoninae + Thymallinae	0.28
	By UCE	13	Salmoninae + Thymallinae	0.36	No	-	Salmo	0.88		Salmoninae + Thymallinae	Coregoninae + Salmoninae	0.565	Coregoninae + Thymallinae	0.27
	"greedy"	1	-	-	-
93% Coverage Alignment	Unpartitioned	1	Salmoninae + Thymallinae	0.96	No	-	Oncorhynchus	0.5		Salmoninae + Thymallinae	Coregoninae + Salmoninae	0.039	Coregoninae + Thymallinae	0.036
	By UCE	28	Salmoninae + Thymallinae	1	No	-	Salmo	0.24		Salmoninae + Thymallinae	Coregoninae + Thymallinae	0.057	Coregoninae + Thymallinae	0.03
	"greedy"	2	Salmoninae + Thymallinae	0.98	No	-	Oncorhynchus	0.66		Salmoninae + Thymallinae	Coregoninae + Salmoninae	0.04	Coregoninae + Thymallinae	0.034
75% Coverage Alignment	Unpartitioned	1	Salmoninae + Thymallinae	0.98	No	-	Oncorhynchus	0.97		Salmoninae + Thymallinae	Coregoninae + Salmoninae	0.041	Coregoninae + Thymallinae	0.028
	By UCE	105	Salmoninae + Thymallinae	0.69	No	-	Oncorhynchus	0.99		Salmoninae + Thymallinae	Coregoninae + Salmoninae	0.038	Coregoninae + Thymallinae	0.021
	"greedy"	8	Salmoninae + Thymallinae	0.94	No	-	Oncorhynchus	0.99		Salmoninae + Thymallinae	Coregoninae + Salmoninae	0.042	Coregoninae + Thymallinae	0.029
Tetrasomic Loci Alignment	Unpartitioned	1	Salmoninae + Thymallinae	0.91	No	-	Salvelinus	0.54		Salmoninae + Thymallinae	Coregoninae + Salmoninae	0.434	Coregoninae + Thymallinae	0.049
	By UCE	33	Salmoninae + Thymallinae	0.55	Yes	0.7	Salvelinus	0.67		Salmoninae + Thymallinae	Coregoninae + Salmoninae	0.434	Coregoninae + Thymallinae	0.063
	"greedy"	2	Salmoninae + Thymallinae	0.9	No	-	Salvelinus	0.64		Salmoninae + Thymallinae	Coregoninae + Salmoninae	0.432	Coregoninae + Thymallinae	0.08
