# Supplementary material for: Addressing incomplete lineage sorting and paralogy in the inference of uncertain salmonid phylogenetic relationships
Source: PeerJ. 2020 Jul 3;8:e9389. doi: 10.7717/peerj.9389 (PMC7337038; doi:10.7717/peerj.9389)
Supplement: Supplemental Information 6 — For each species, the identifier and source collection are identified. [file peerj-08-9389-s006.xlsx]

## Sheet: Sheet1
Species	Tissue Identifier	Originating Institution
Brachymystax lenok	ANSP 185125	ANSP
Brachymystax lenok	ANSP 185429	ANSP
Coregonus laurettae	BIYUK.0901.91 (UAMN)	UAMN
Coregonus laurettae	BIYUK.0901.52 (UAMN)	UAMN
Coregonus nasus	UAMN 156264	UAMN
Coregonus nasus	UAMN 156265	UAMN
Coregonus nasus	UAMN 156266	UAMN
Coregonus pidschian	Mac-2011-17 (UAMN)	UAMN
Coregonus pidschian	Mac-2011-18 (UAMN)	UAMN
Coregonus sardinella	Mac-2011-16 (UAMN)	UAMN
Dallia pectoralis	UAMN 155196	UAMN
Dallia pectoralis	UAMN 155197	UAMN
Dallia pectoralis	UAMN 155198	UAMN
Dallia pectoralis	UAMN 155312	UAMN
Dallia pectoralis	UAMN 155297	UAMN
Dallia pectoralis	UAMN 156540	UAMN
Esox americanus verm.	PWW03-09-T6 (FMNH)	FMNH
Esox americanus verm.	PWW-09-T7 (FMNH)	FMNH
Esox lucius	UAMN 155331	UAMN
Esox lucius	UAMN 155332	UAMN
Esox niger	ANSP 189035	ANSP
Esox reichertii	ANSP 185217	ANSP
Hucho taimen	ANSP 185124	ANSP
Hucho taimen	ANSP 185429	ANSP
Hucho taimen	ANSP 185124	ANSP
Hucho taimen	ANSP 185416	ANSP
Novumbra hubbsi	UAMN 155222	UAMN
Novumbra hubbsi	UAMN 155225	UAMN
Novumbra hubbsi	UAMN 155226	UAMN
Oncorhynchus mykiss	UAMN 155339	UAMN
Oncorhynchus mykiss	UAMN 155340	UAMN
Oncorhynchus nerka	Mac-2011-15 (UAMN)	UAMN
Oncorhynchus tshawytscha	UAMN 156101	UAMN
Parahucho perryi	UAMN 155977	UAMN
Parahucho perryi	UAMN 155978	UAMN
Prosopium cylindraceum	UAMN 155548	UAMN
Prosopium cylindraceum	UAMN 155548	UAMN
Prosopium cylindraceum	UAMN 155470	UAMN
Salmo salar	UWFC 21734-1	BMUW
Salmo salar	UWFC 21734-2	BMUW
Salvelinus alpinus	Mac-2011-04A (UAMN)	UAMN
Salvelinus alpinus	Mac-2011-04B (UAMN)	UAMN
Salvelinus namaycush	Mac-2011-14 (UAMN)	UAMN
Salvelinus namaycush	Mac-2012-03 (UAMN)	UAMN
Stenodus leucichthys	UAMN 157098	UAMN
Stenodus leucichthys	UAMN 157104	UAMN
Stenodus leucichthys	UAMN 157086	UAMN
Thymallus arcticus	Mac-2011-08 (UAMN)	UAMN
Thymallus grubii	ANSP 185422	ANSP
Thymallus grubii	ANSP 185427	ANSP
Umbra krameri	UWFC 41668-1	BMUW
Umbra krameri	UWFC 41668-2	BMUW
Umbra krameri	UWFC 41668-3	BMUW
Umbra krameri	UWFC 41668-4	BMUW
Umbra pygmaea	"Umbra pygmae" (UAMN)	UAMN
