# Supplementary material for: Addressing incomplete lineage sorting and paralogy in the inference of uncertain salmonid phylogenetic relationships
Source: PeerJ journal article supplement (doi:10.7717/peerj.9389), 2020-07-03

# Animals

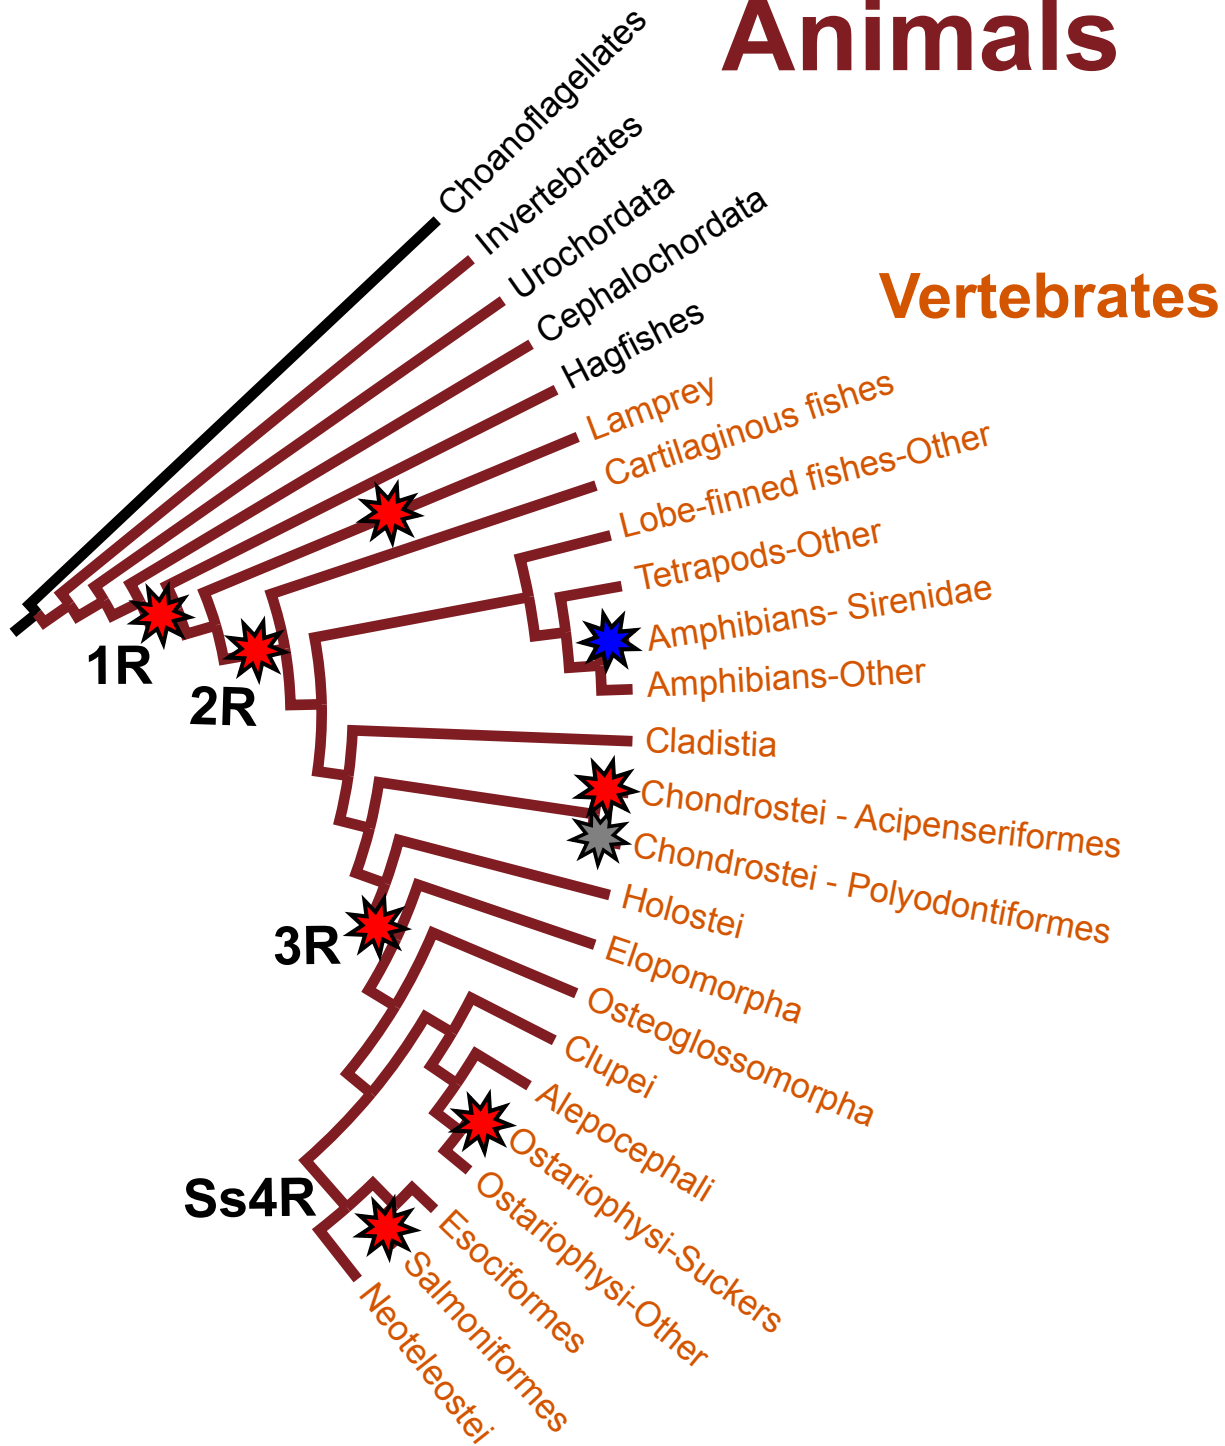

Supplement: Supplemental_Figure_S1.pdf [file Supplemental_Figure_S1.pdf]
