# Supplementary figures and images for: Addressing incomplete lineage sorting and paralogy in the inference of uncertain salmonid phylogenetic relationships
Source: PeerJ journal article supplement (doi:10.7717/peerj.9389), 2020-07-03

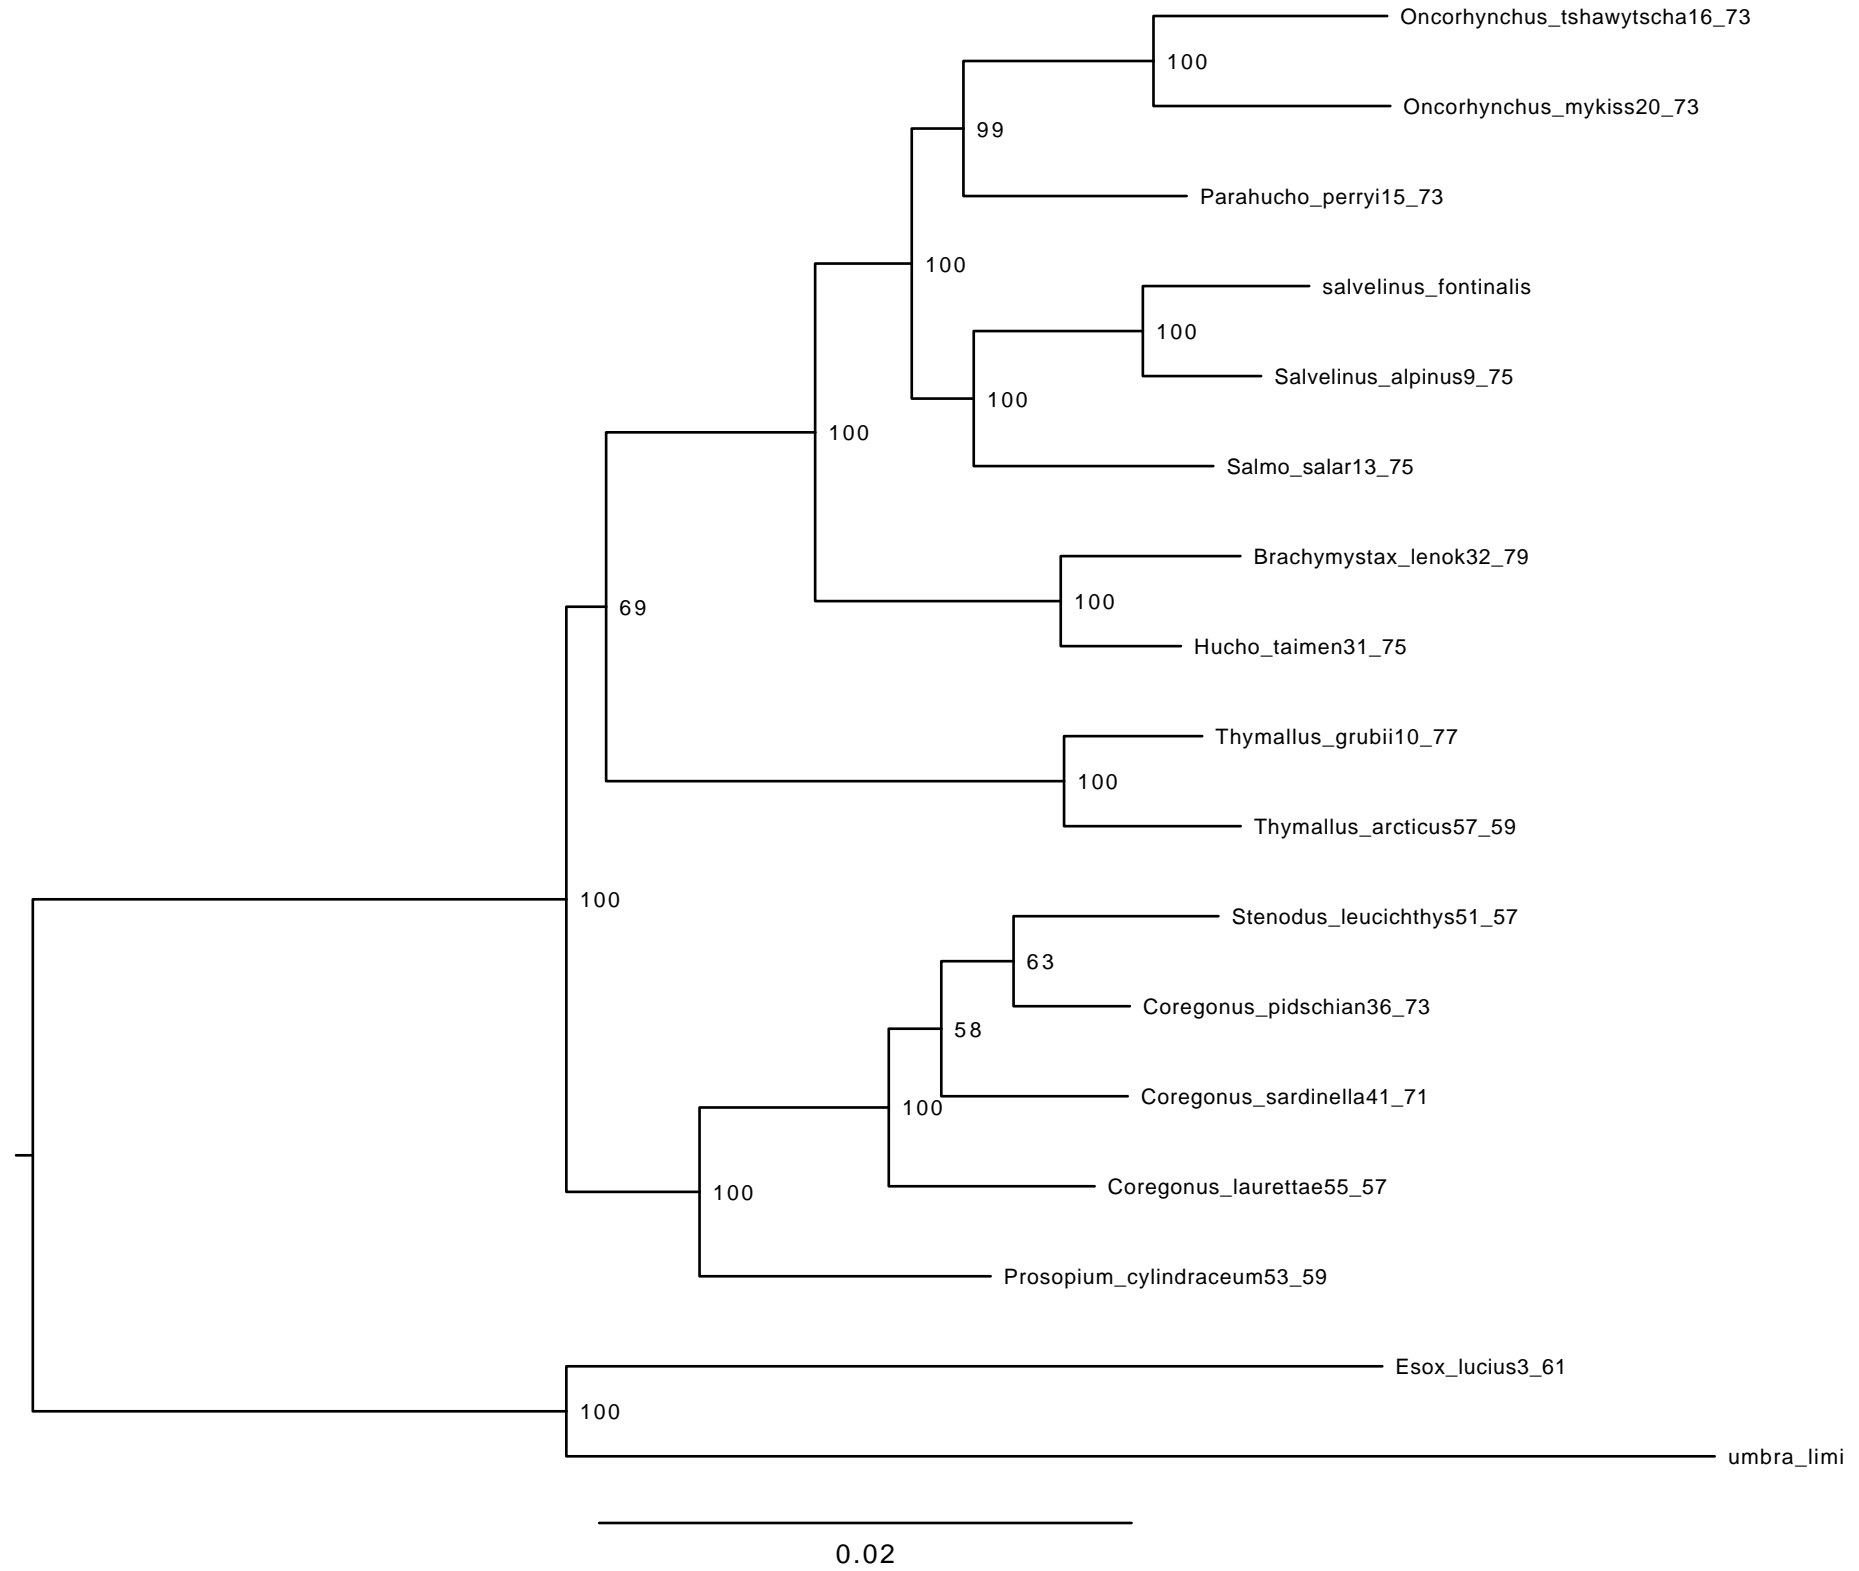

Supplement: Data_Supplement.zip [file Data_Supplement.zip]

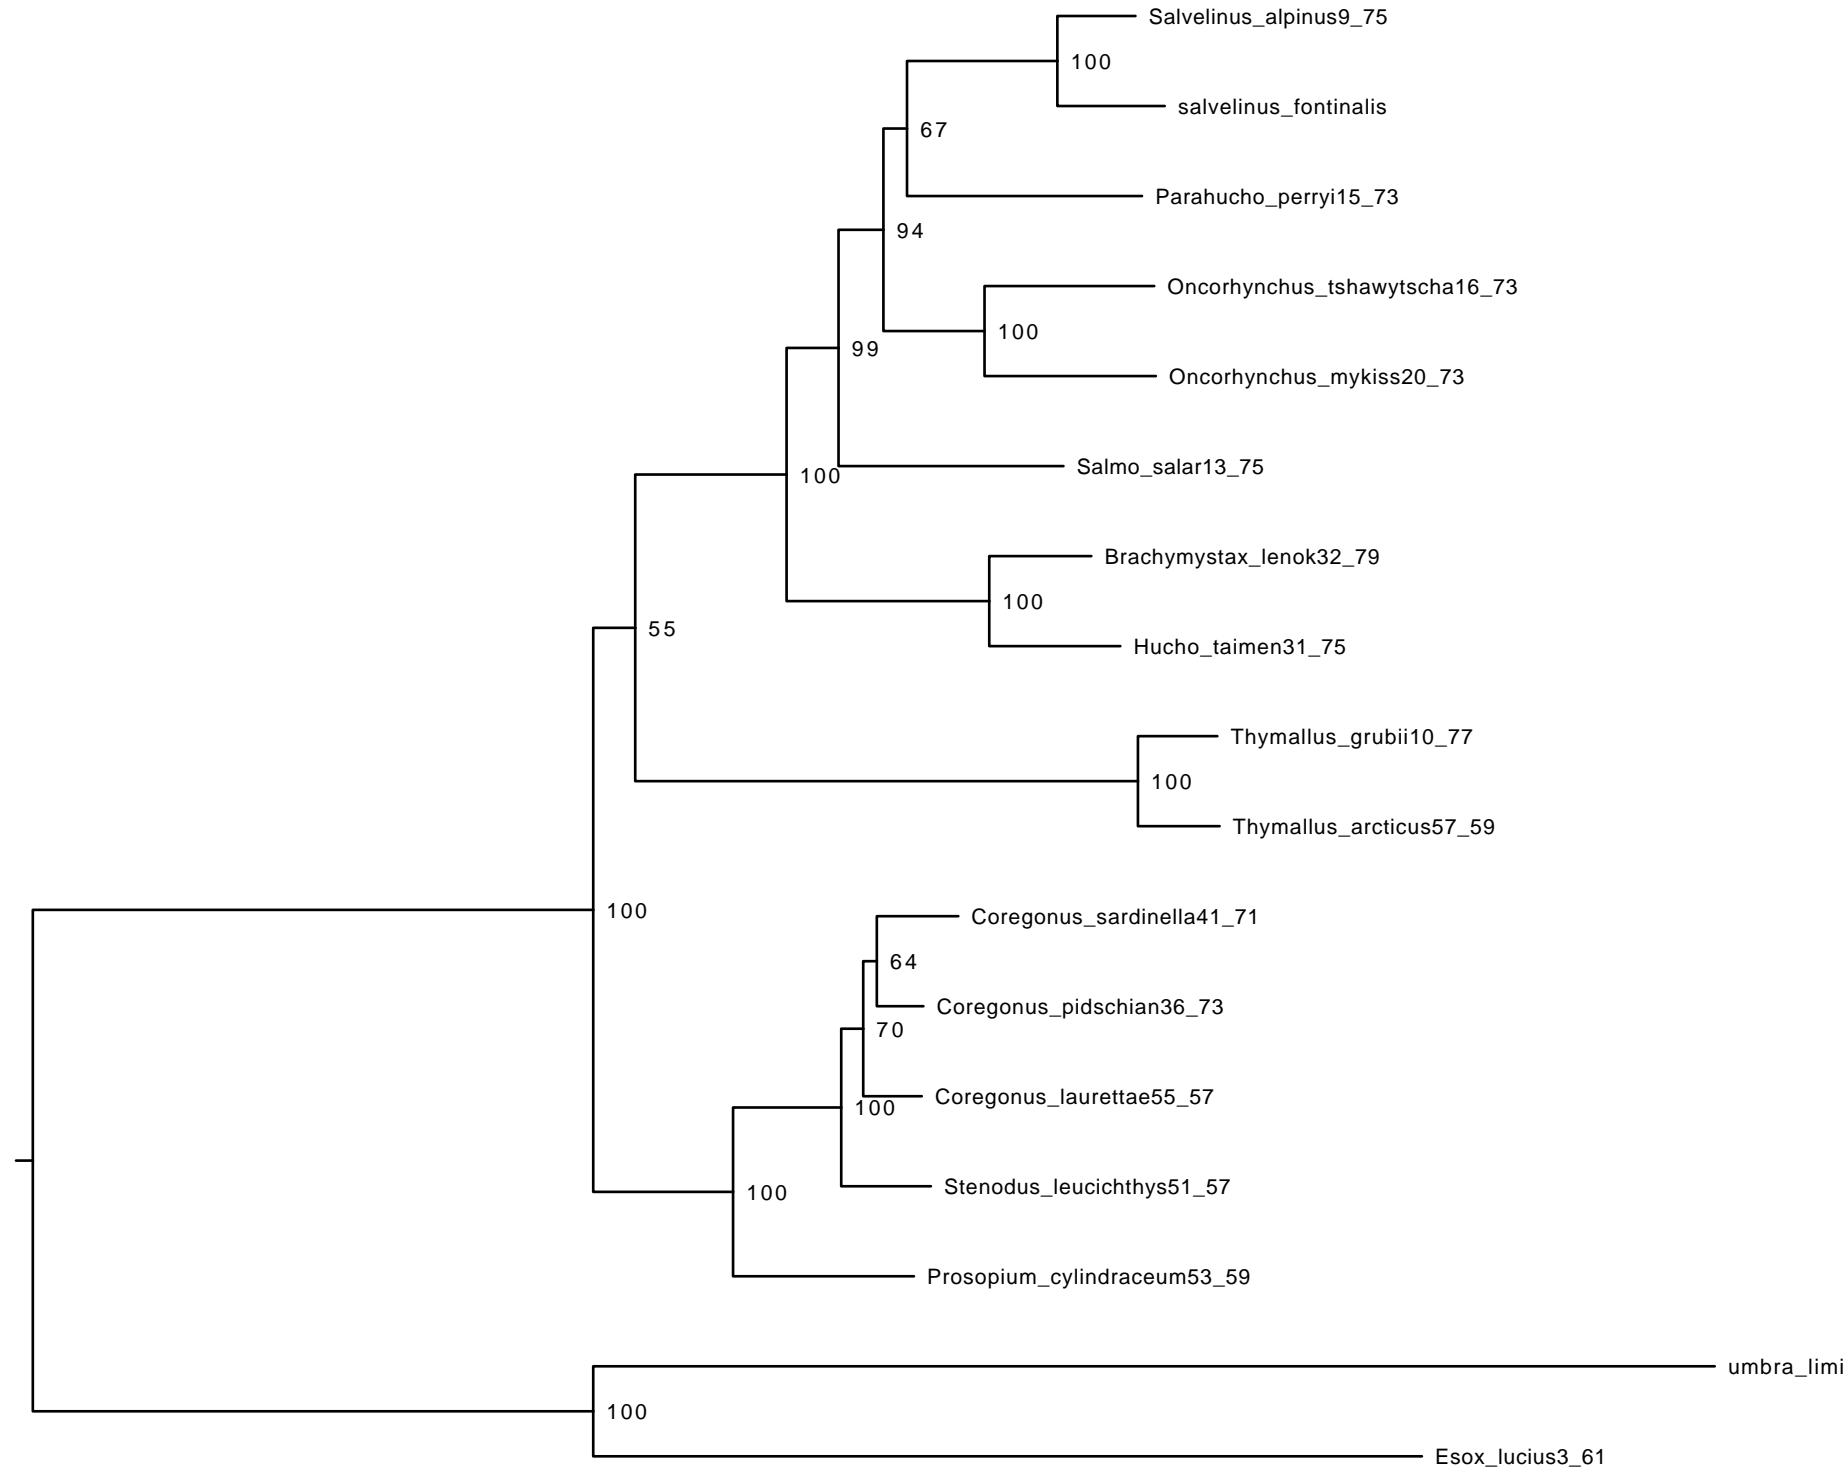

0.01

Supplement: Data_Supplement.zip [file Data_Supplement.zip]

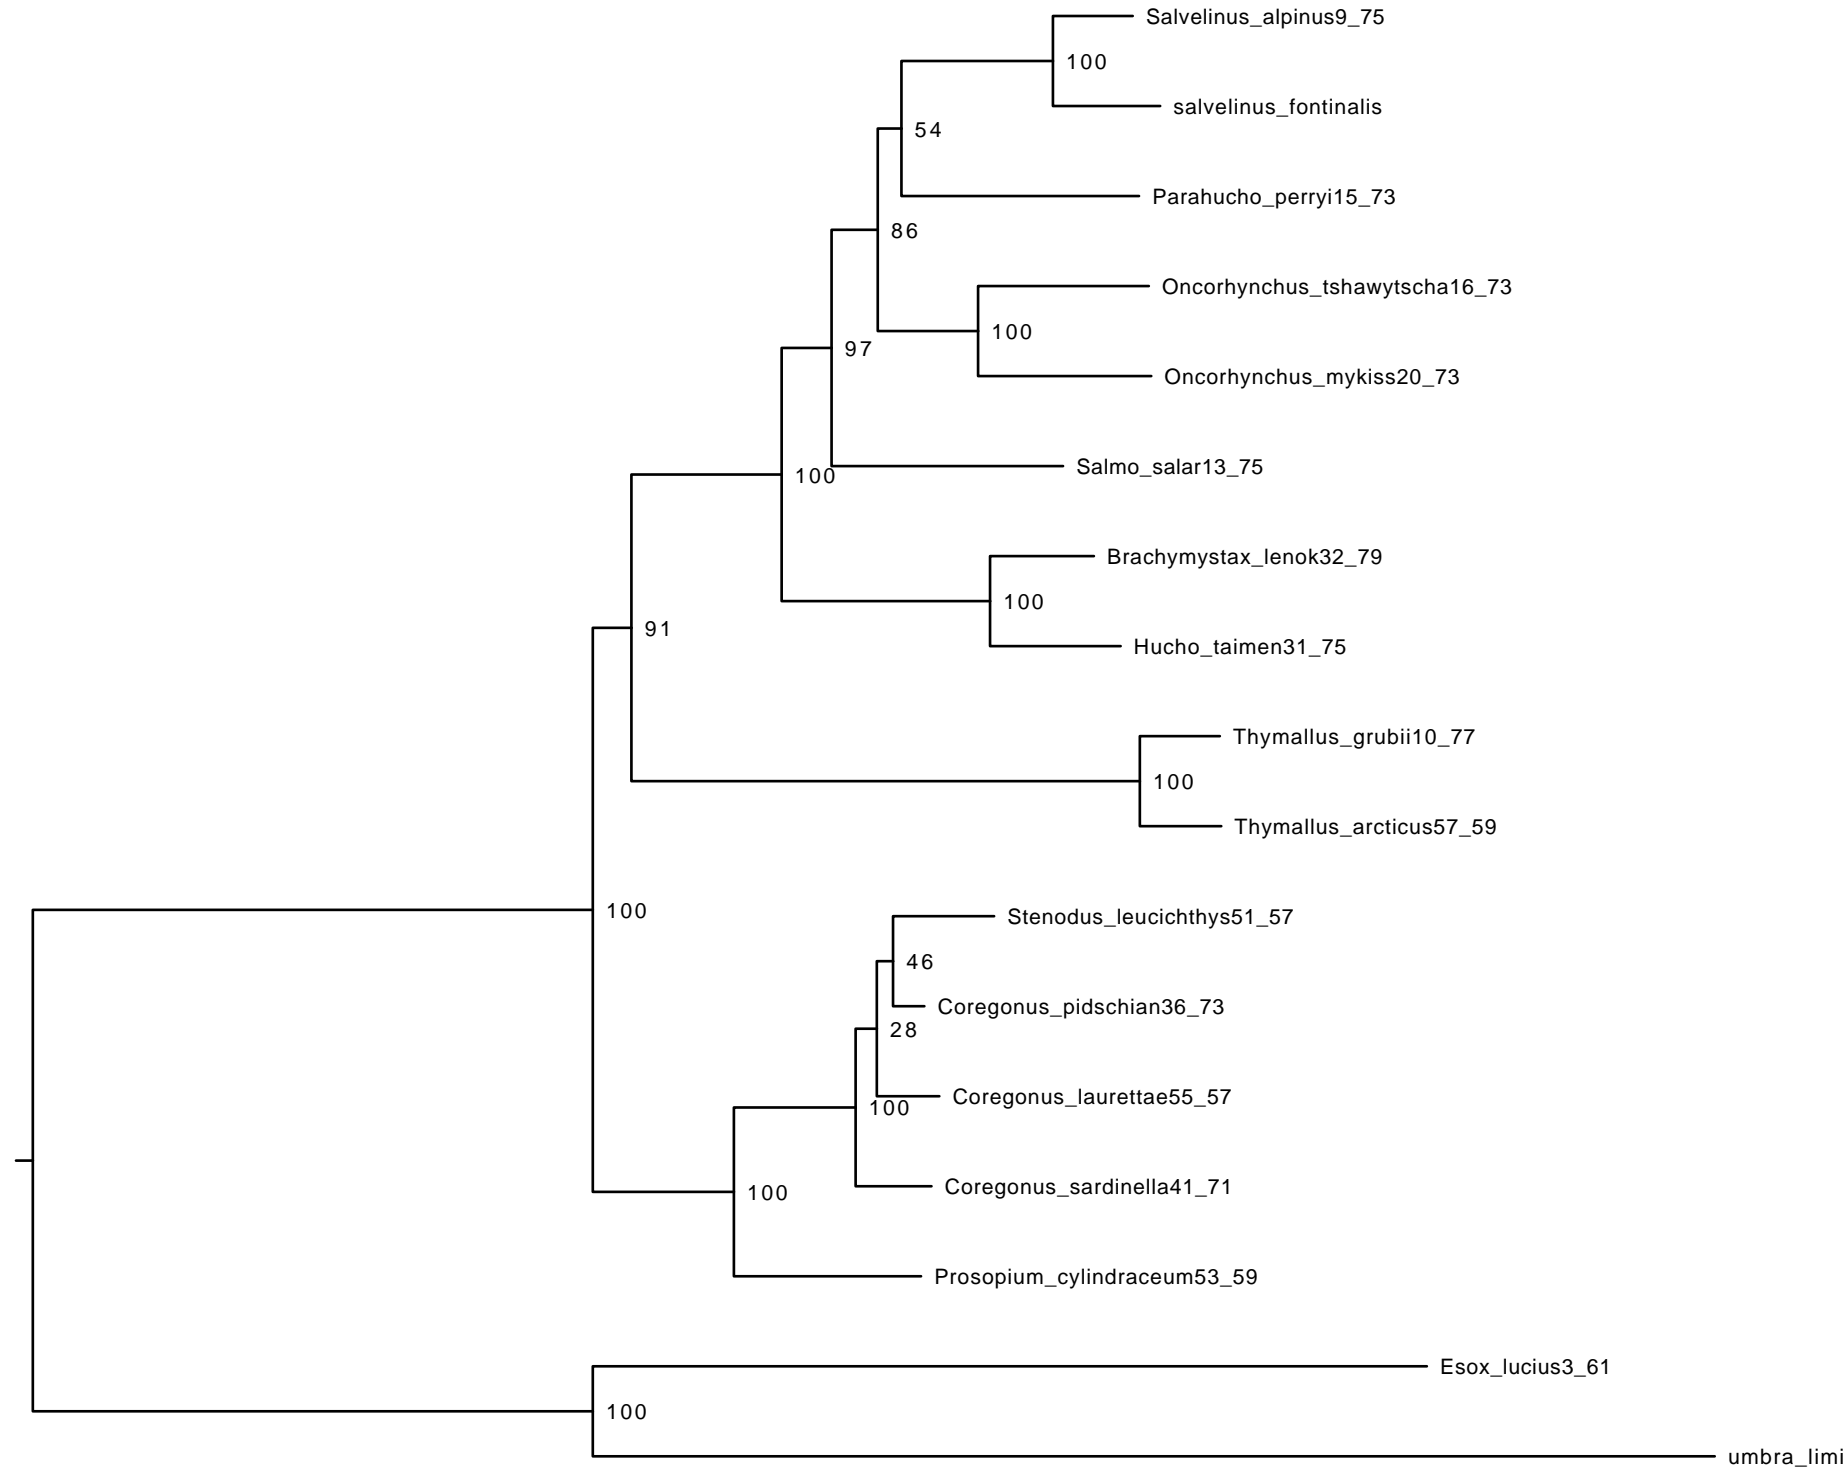

0.0090

Supplement: Data_Supplement.zip [file Data_Supplement.zip]

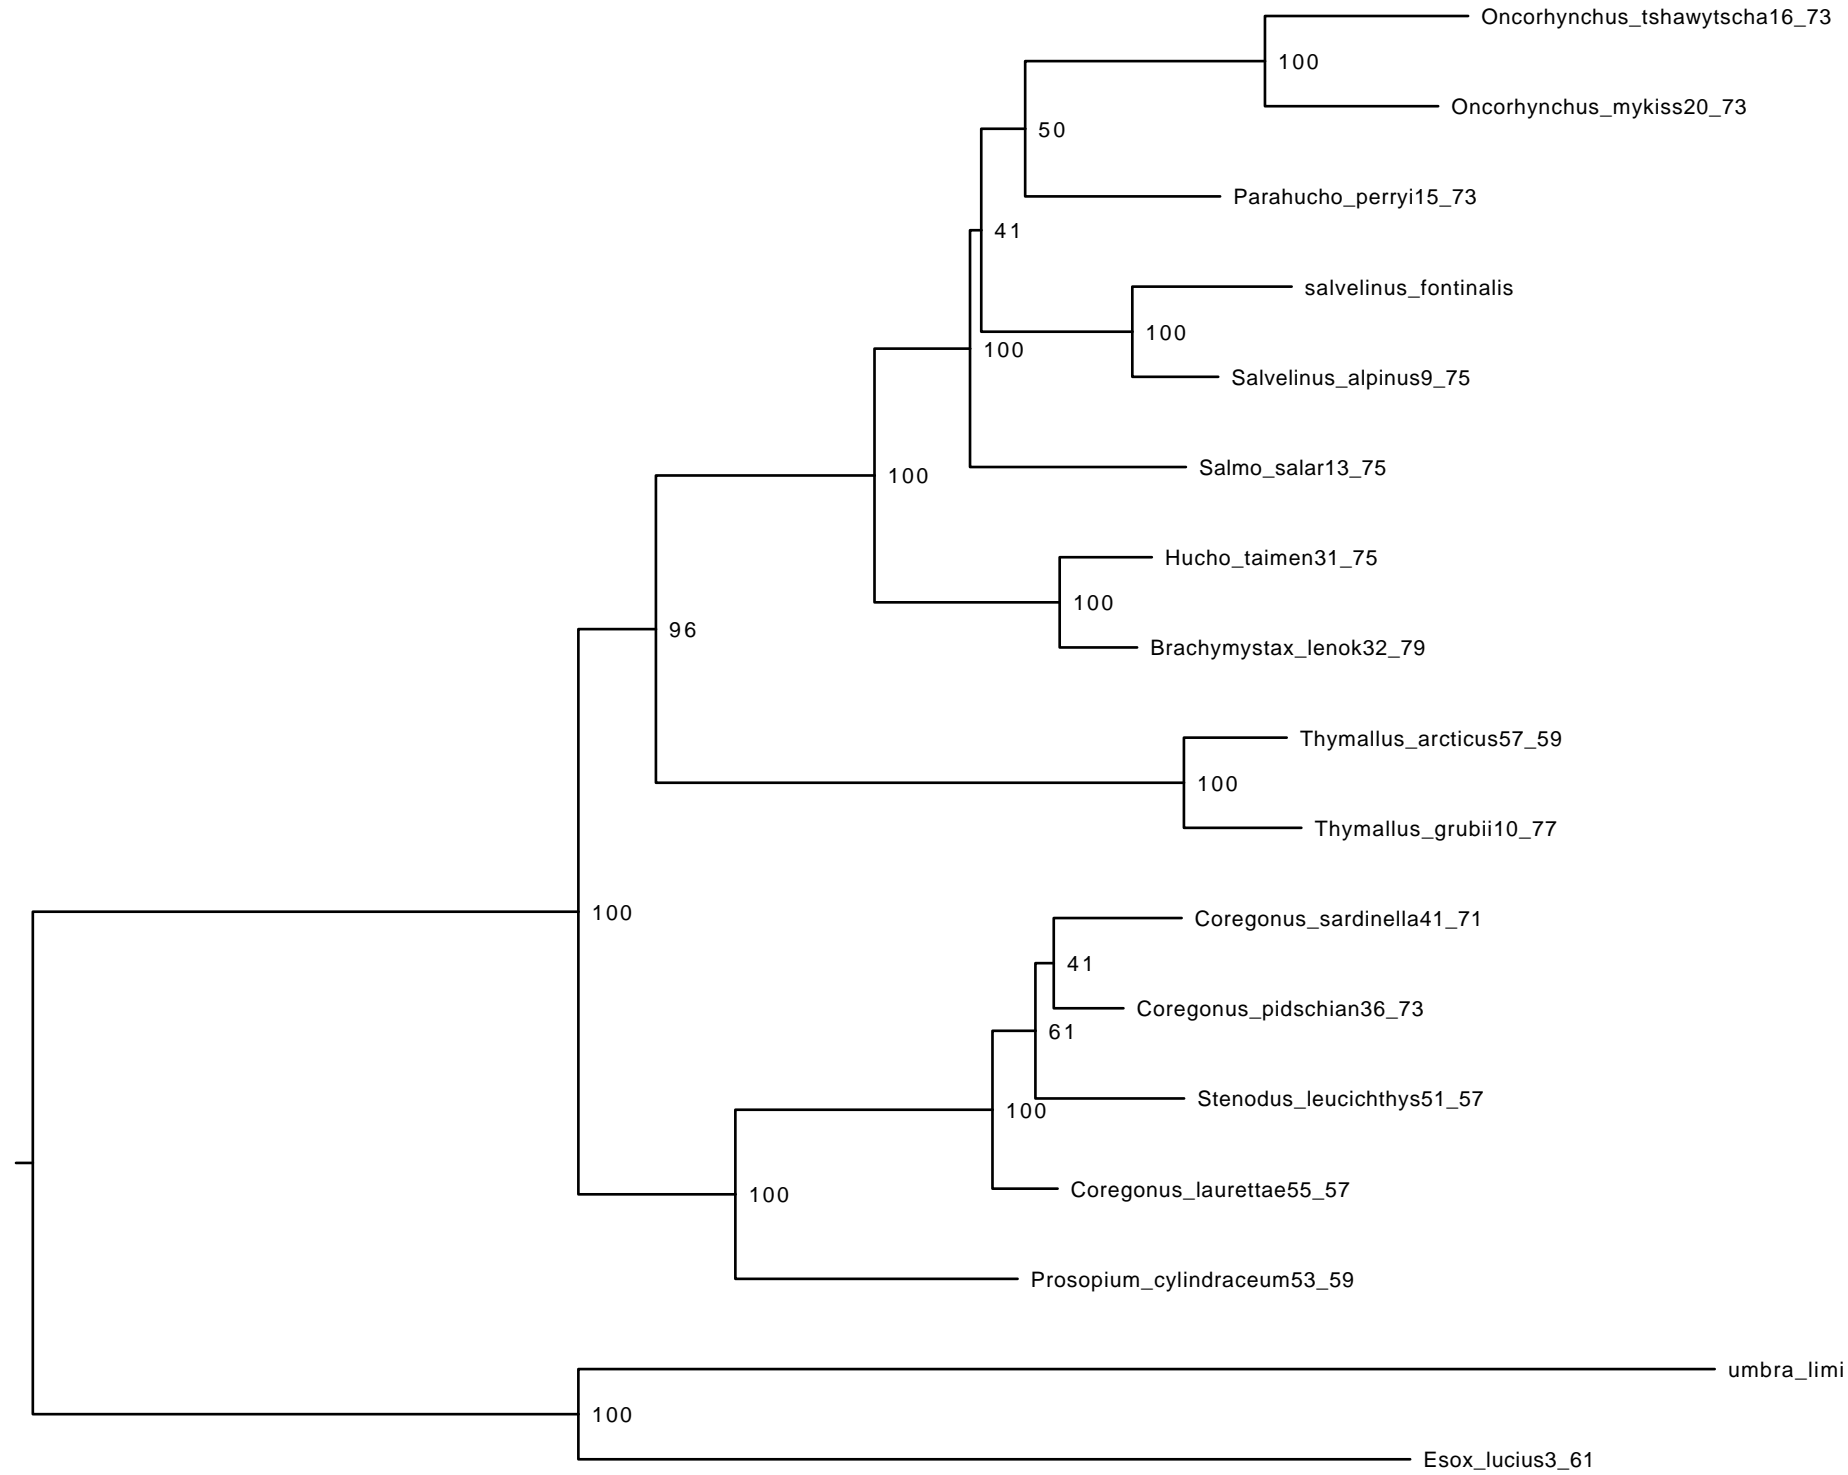

0.0090

Supplement: Data_Supplement.zip [file Data_Supplement.zip]

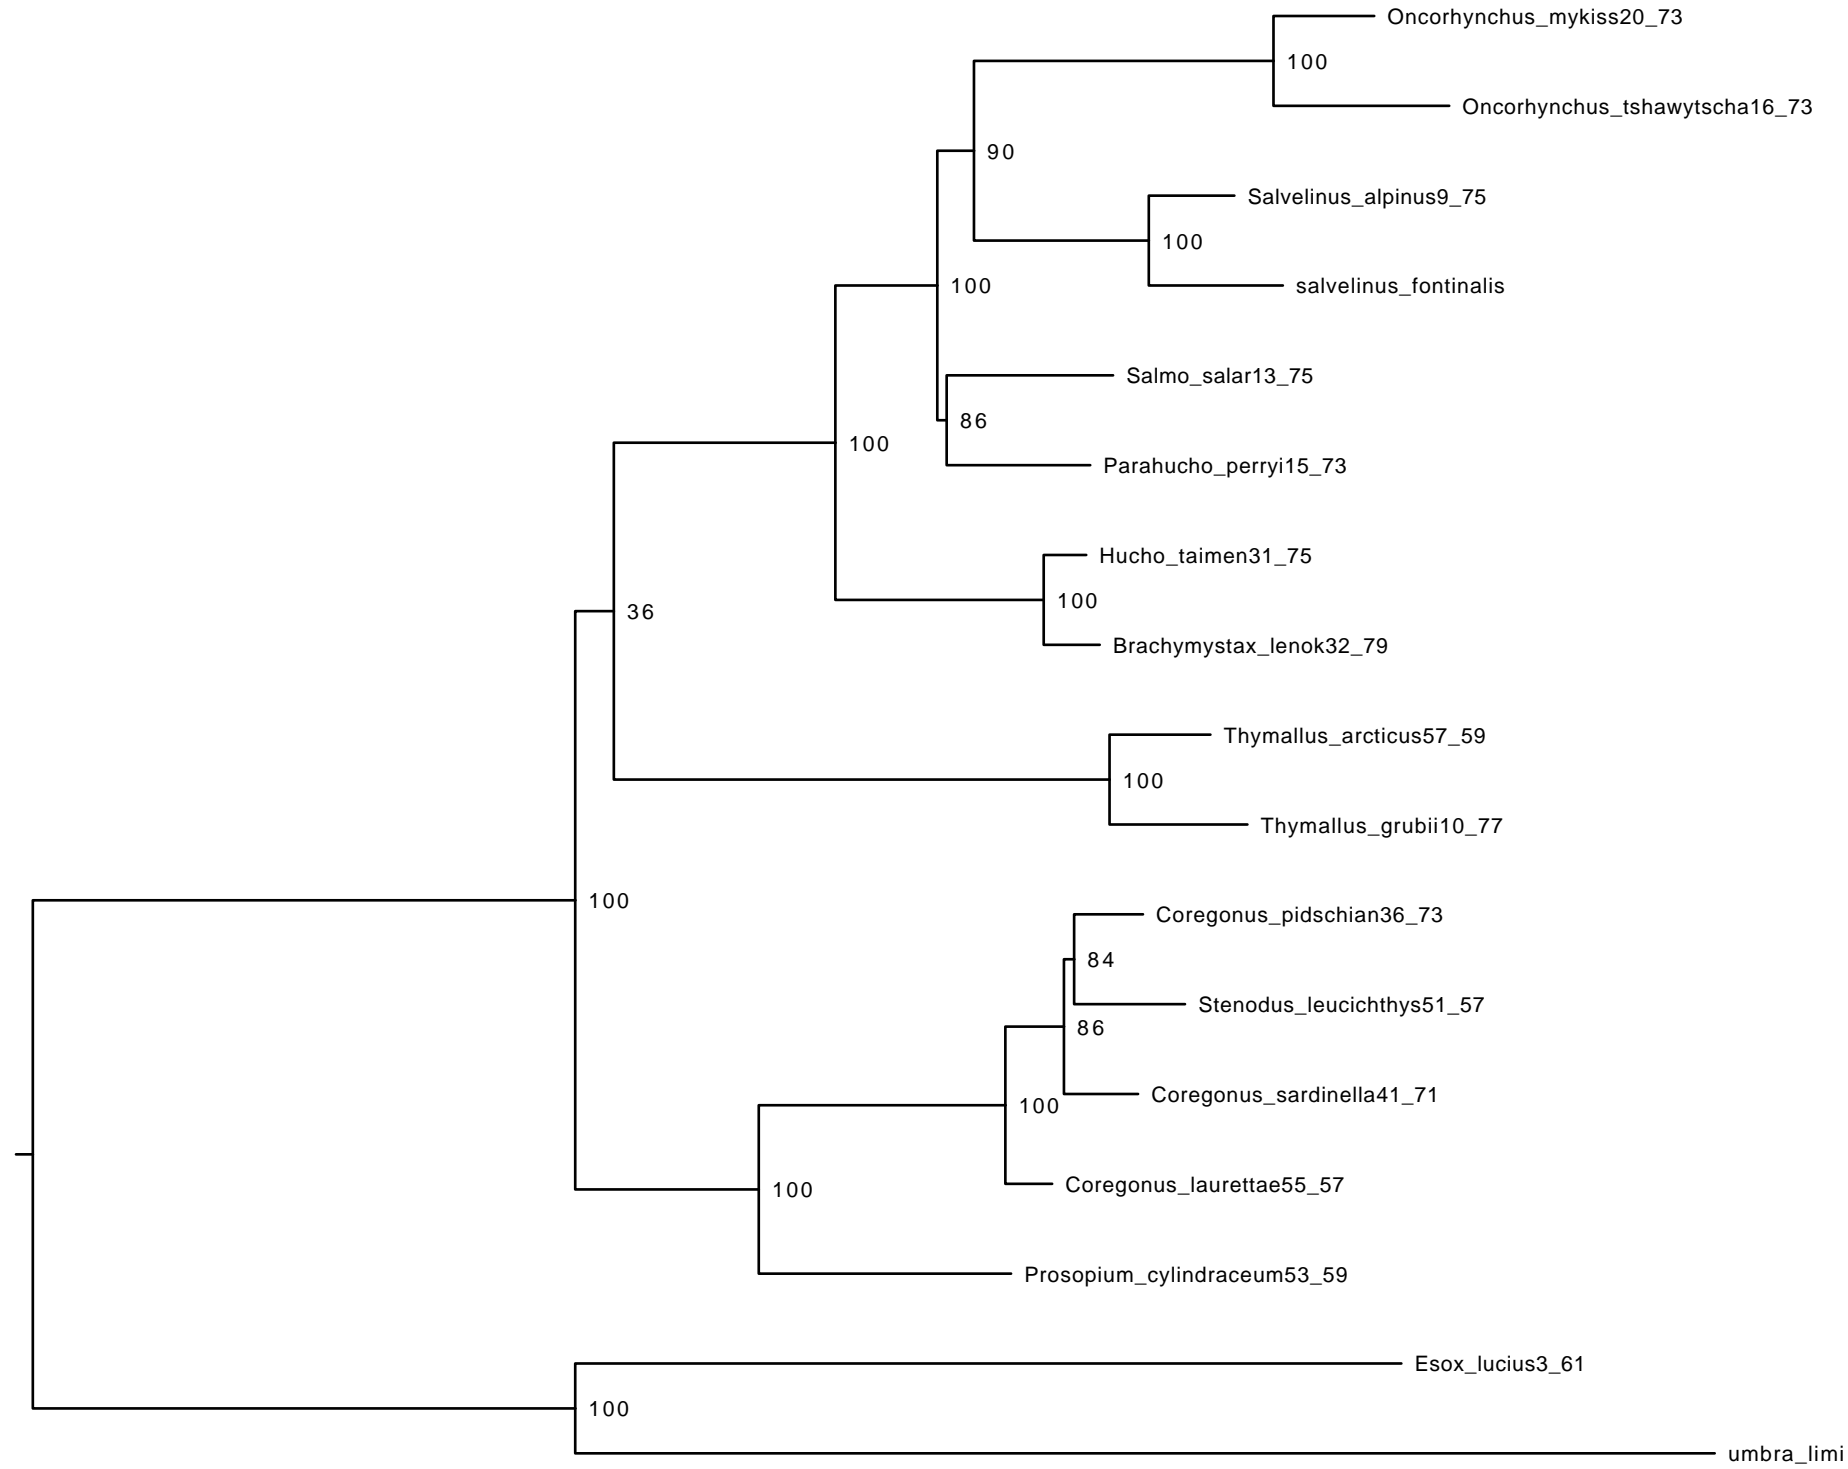

0.01

Supplement: Data_Supplement.zip [file Data_Supplement.zip]

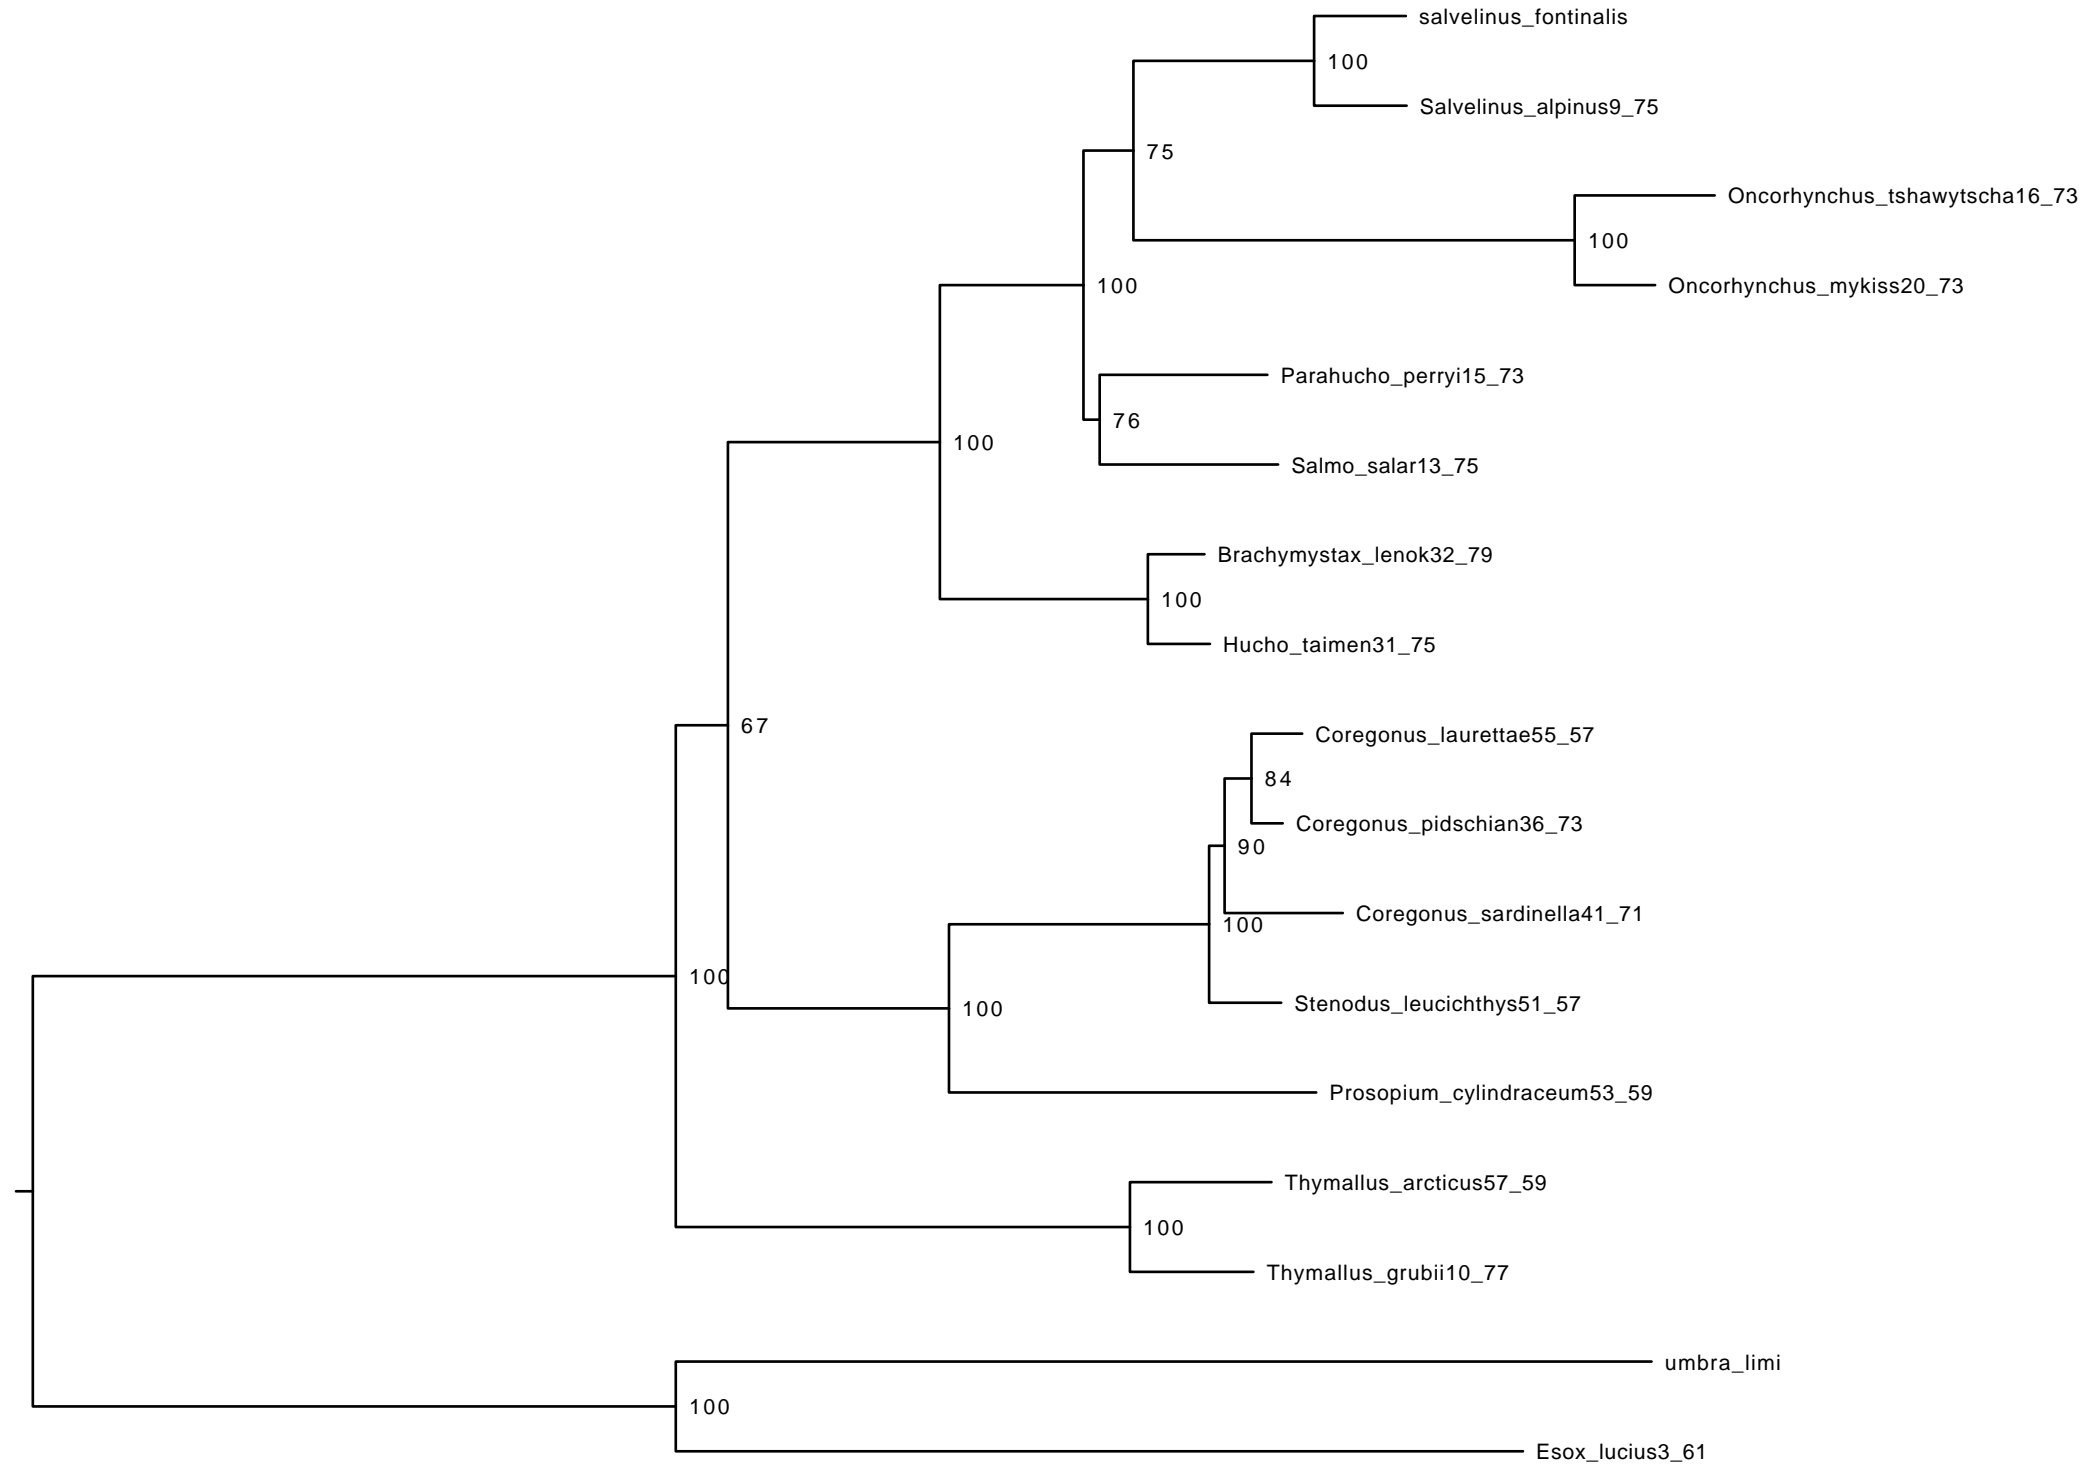

Supplement: Data_Supplement.zip [file Data_Supplement.zip]

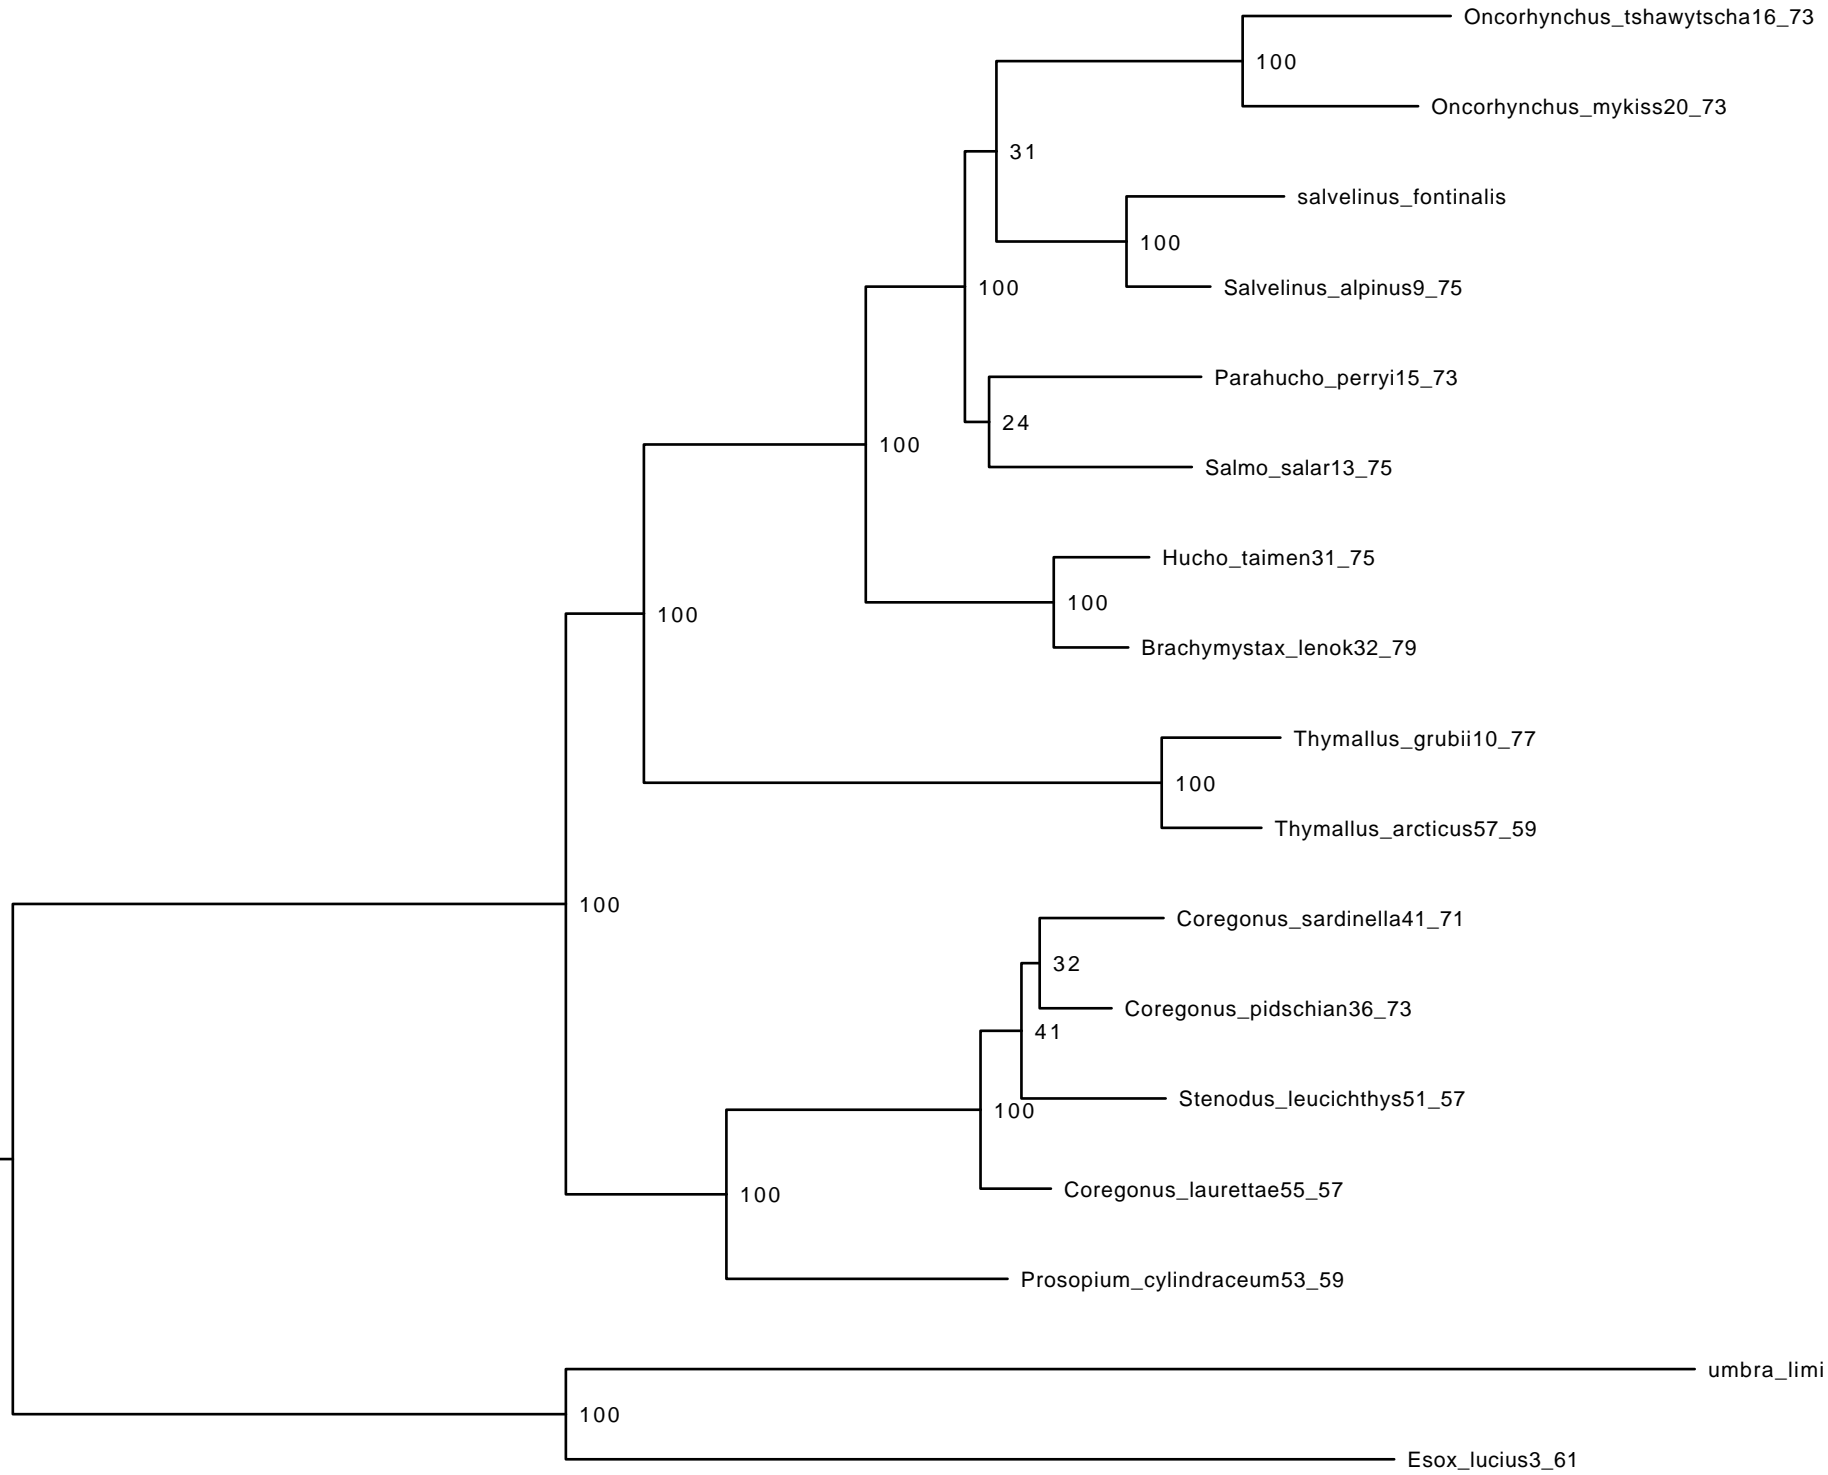

0.01

Supplement: Data_Supplement.zip [file Data_Supplement.zip]

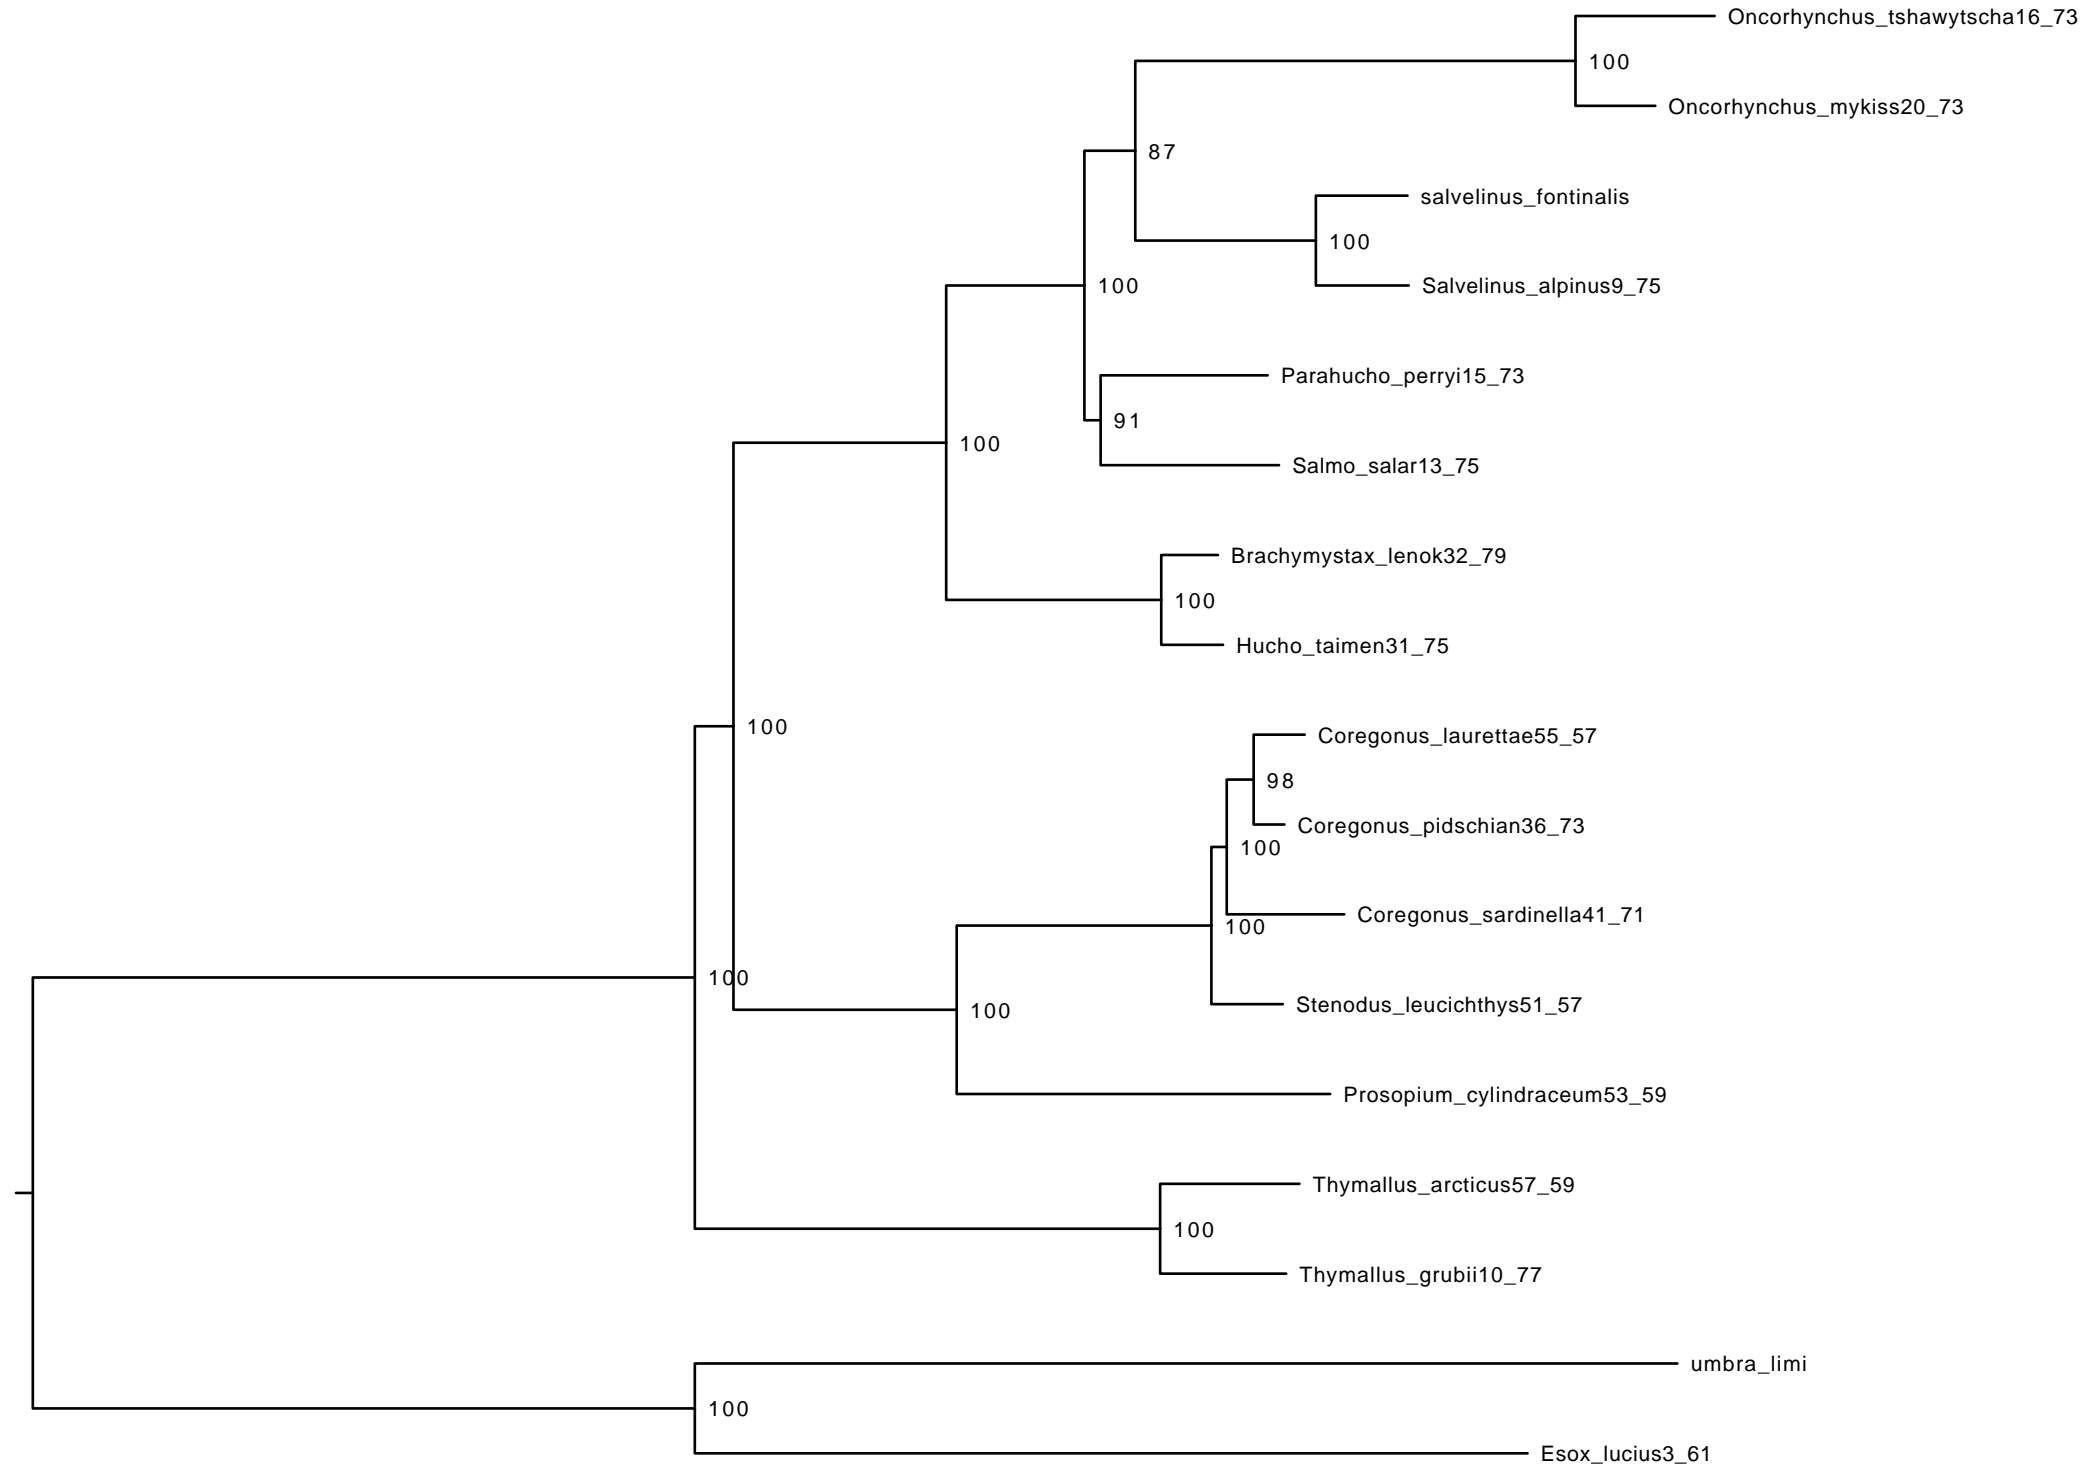

Supplement: Data_Supplement.zip [file Data_Supplement.zip]

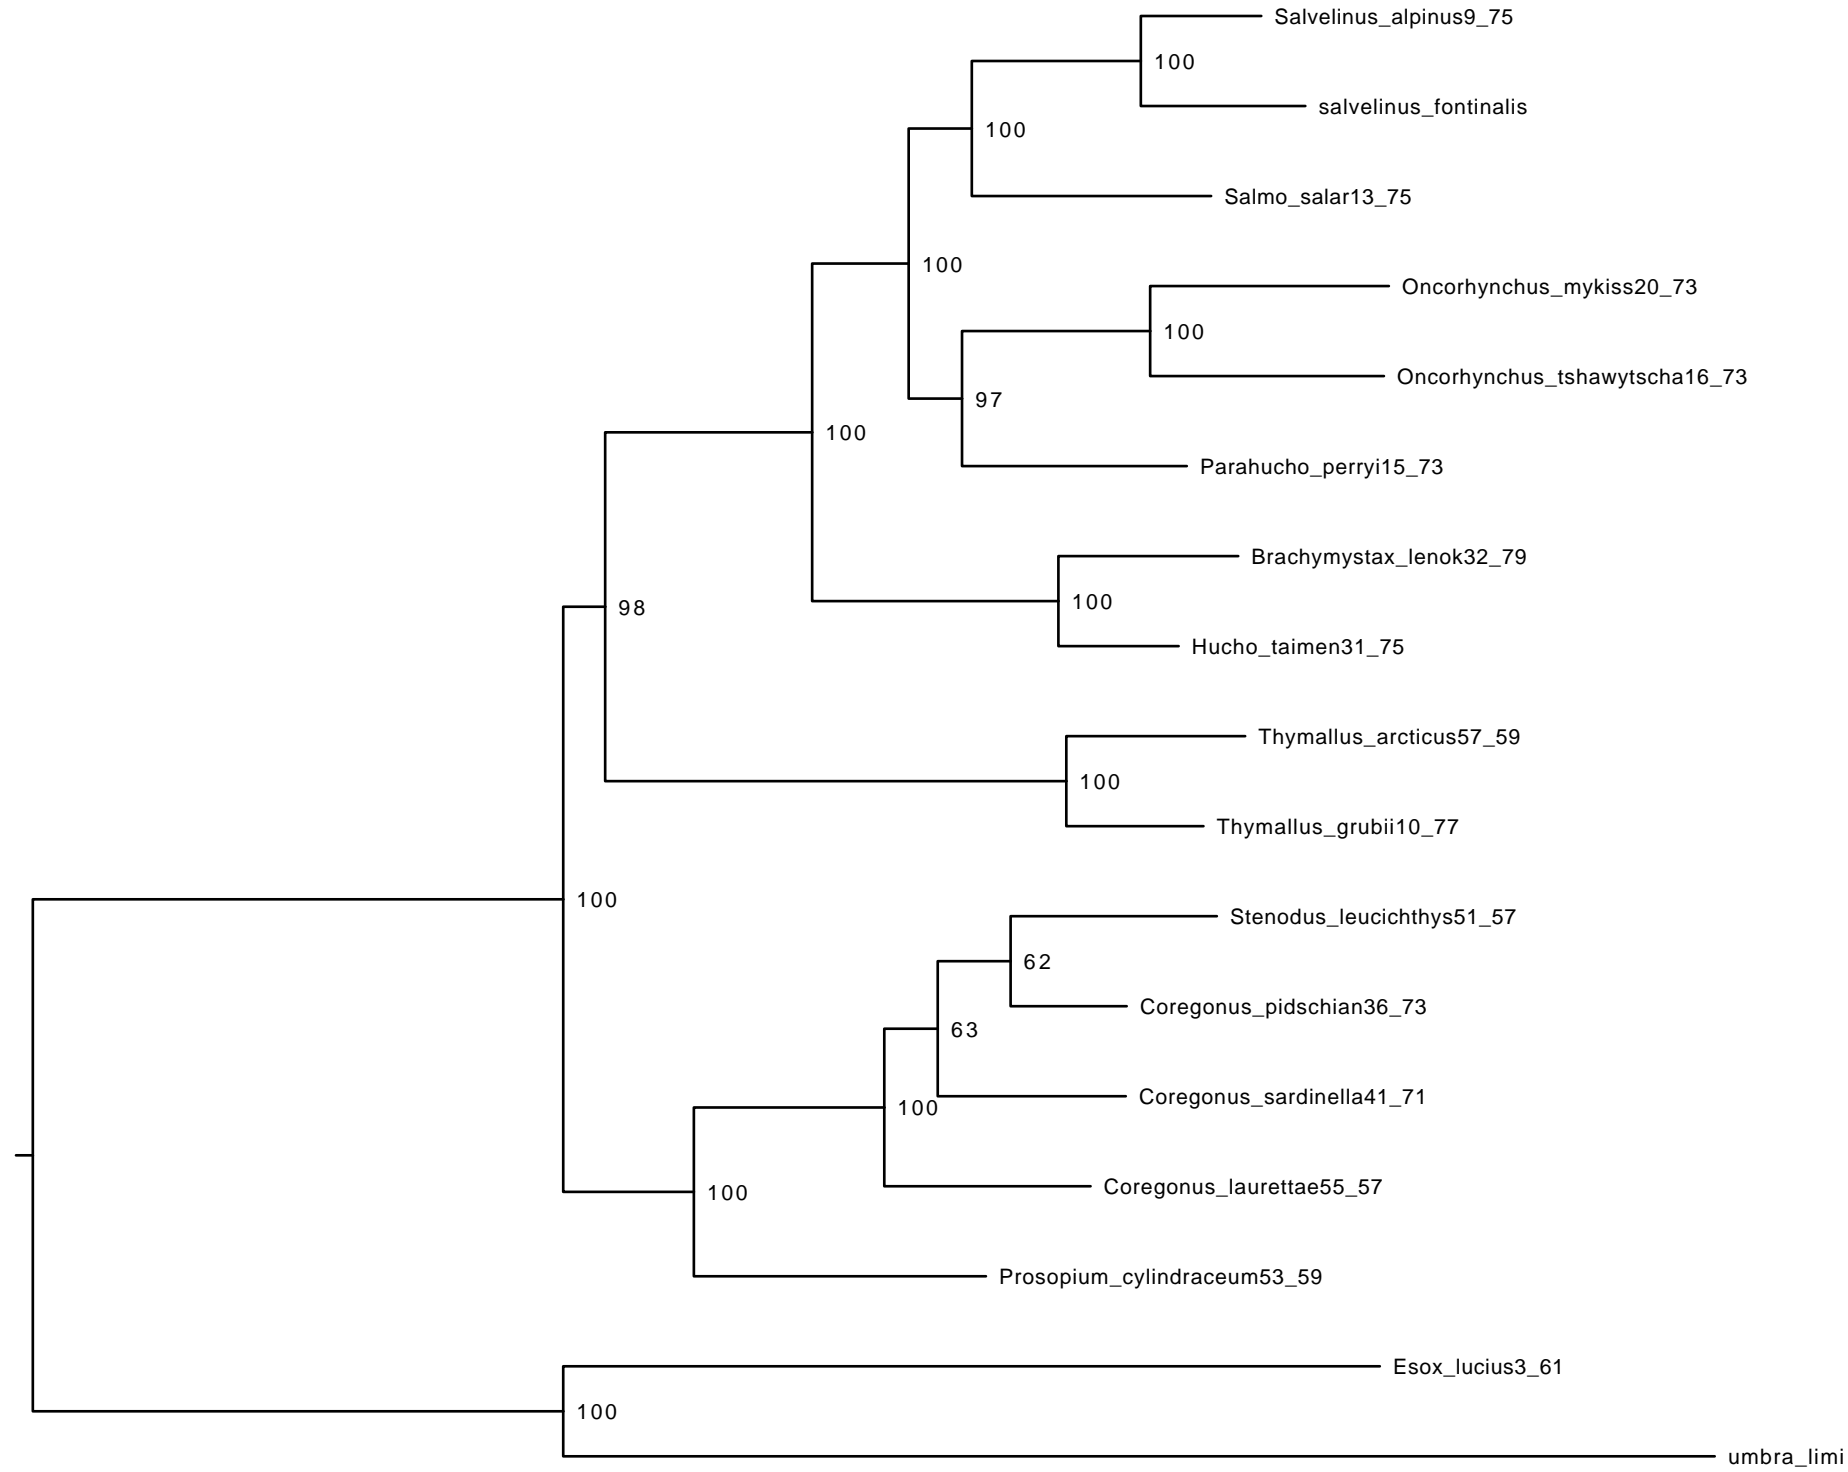

0.01

Supplement: Data_Supplement.zip [file Data_Supplement.zip]

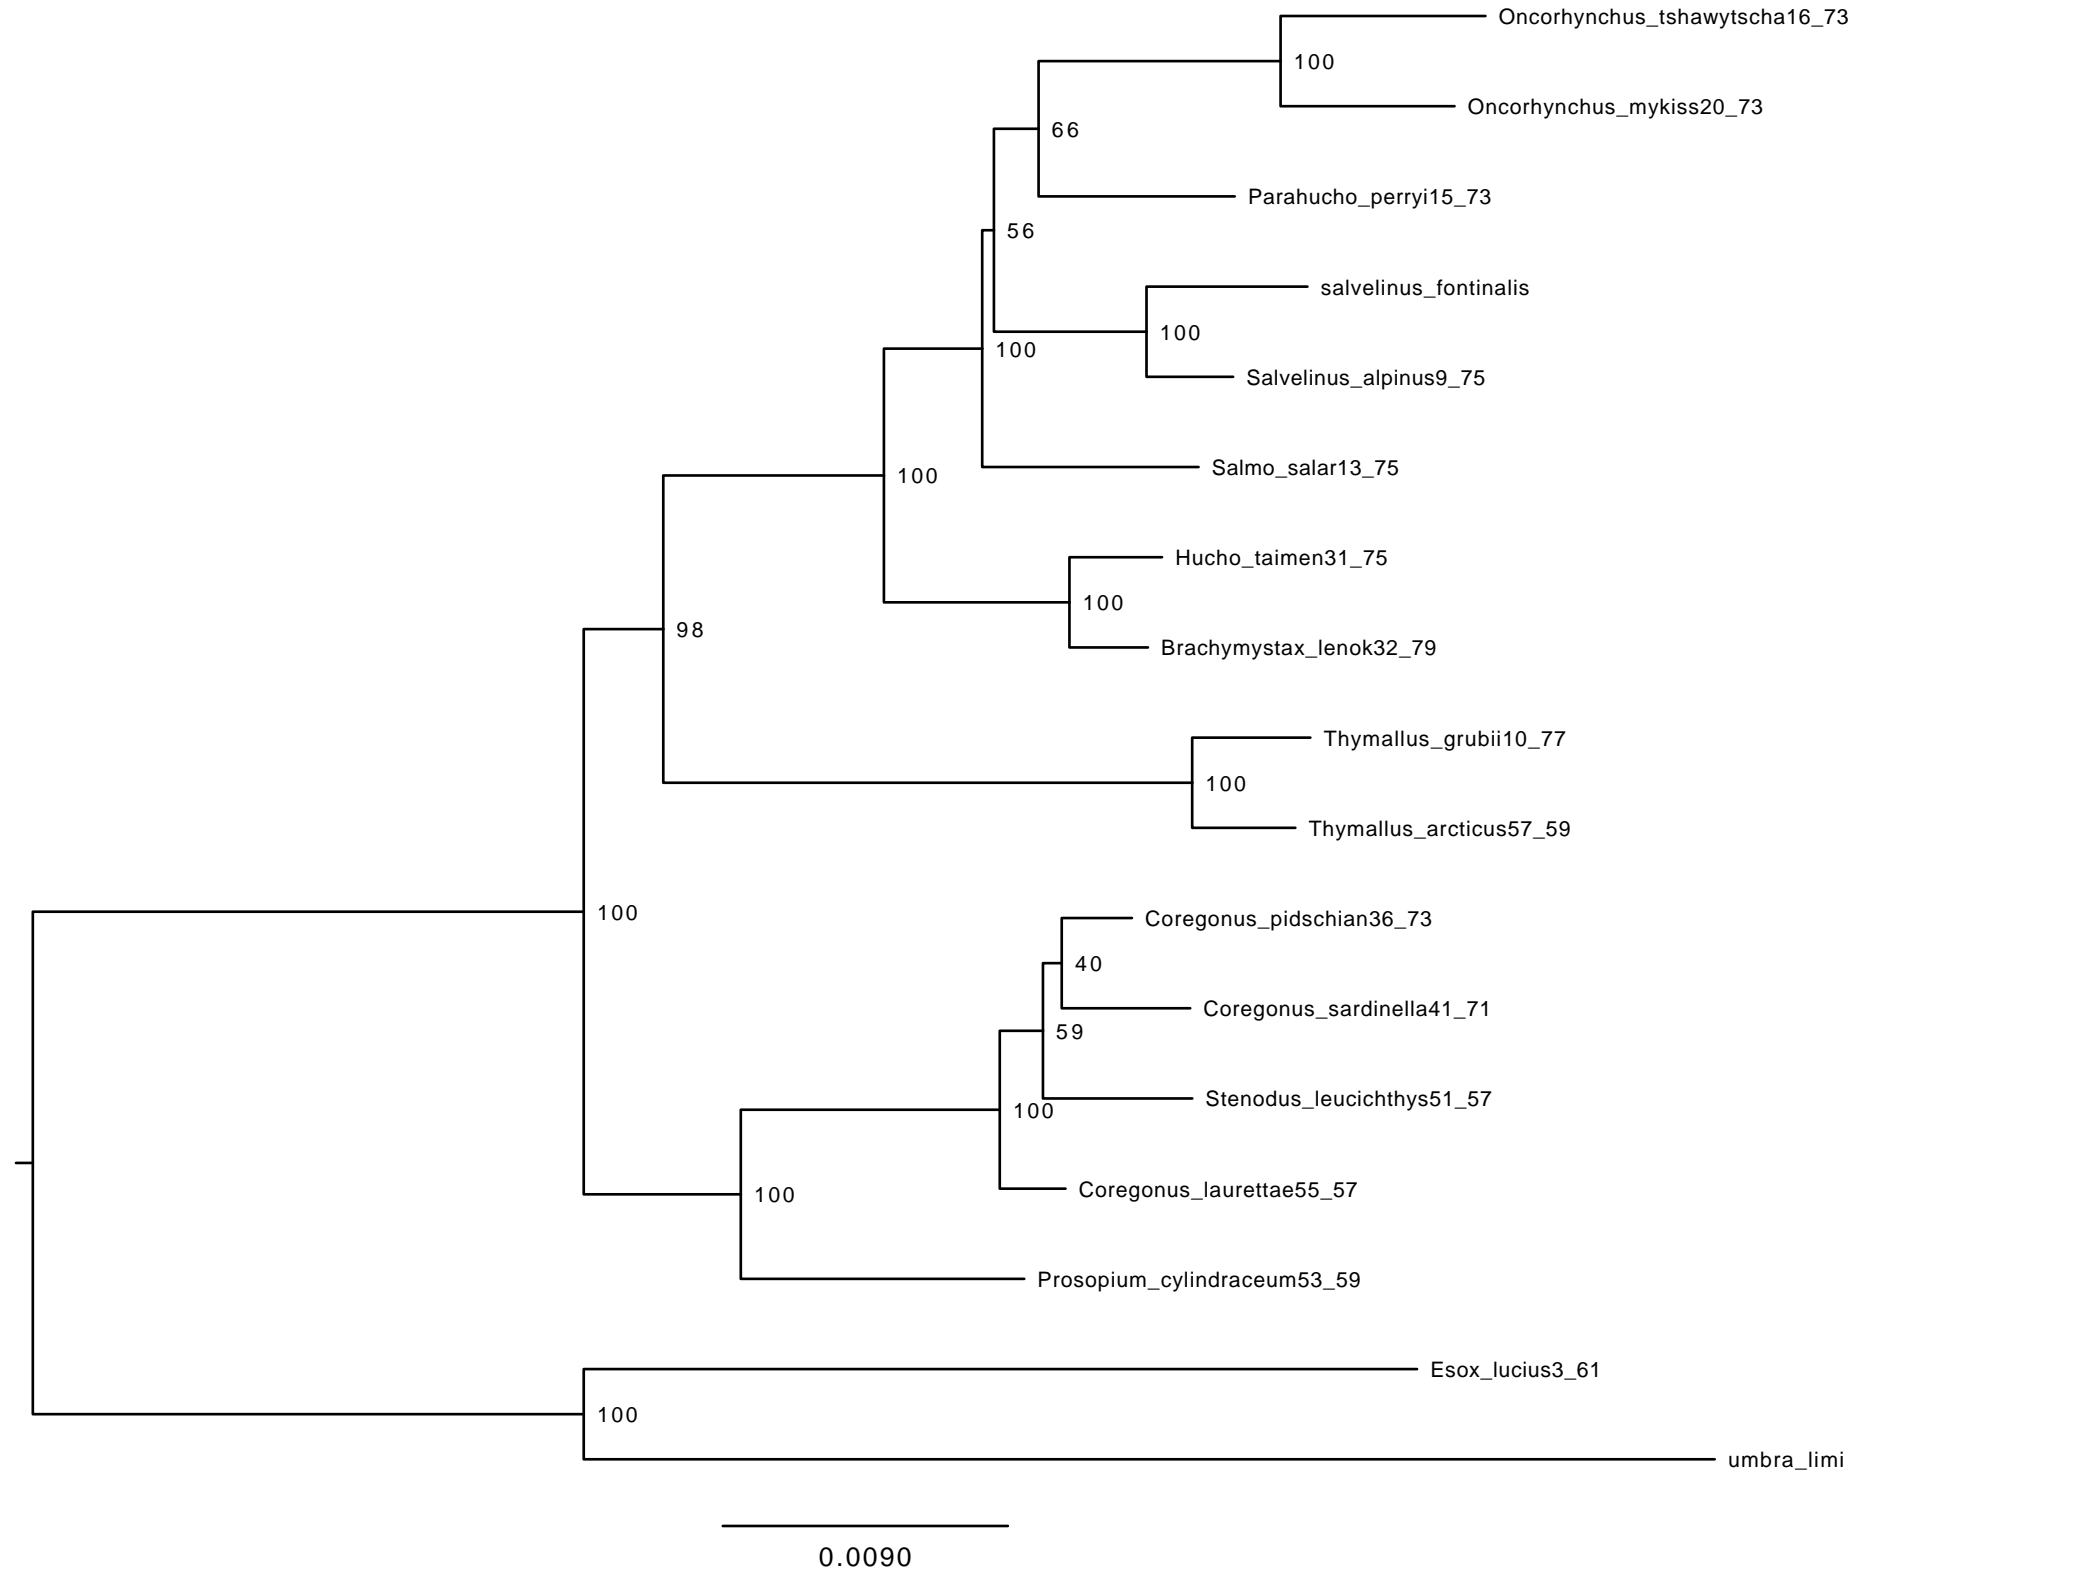

Supplement: Data_Supplement.zip [file Data_Supplement.zip]

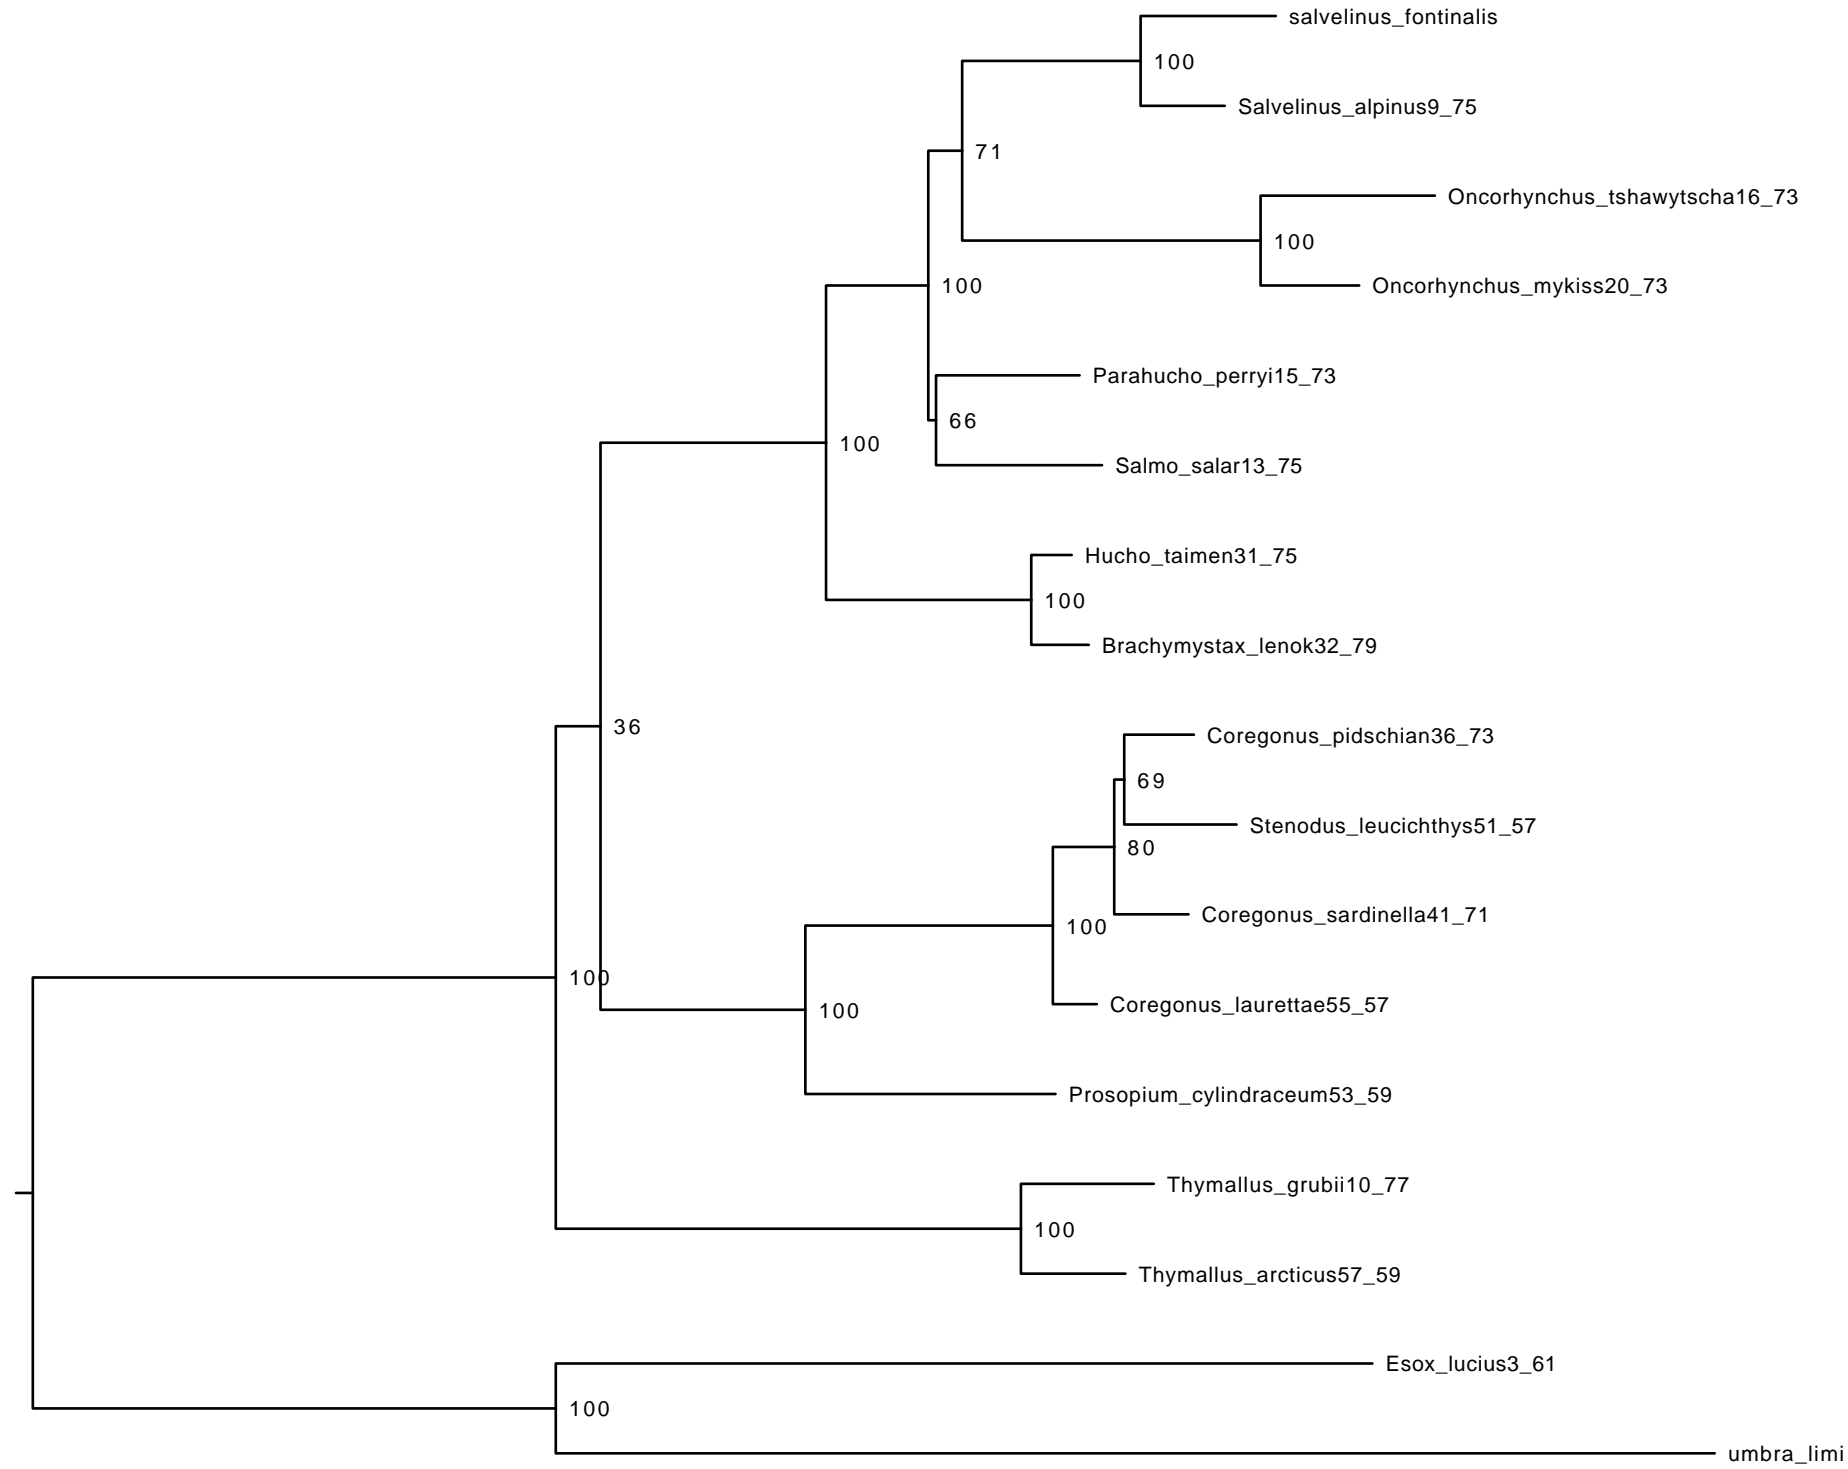

0.01

Supplement: Data_Supplement.zip [file Data_Supplement.zip]

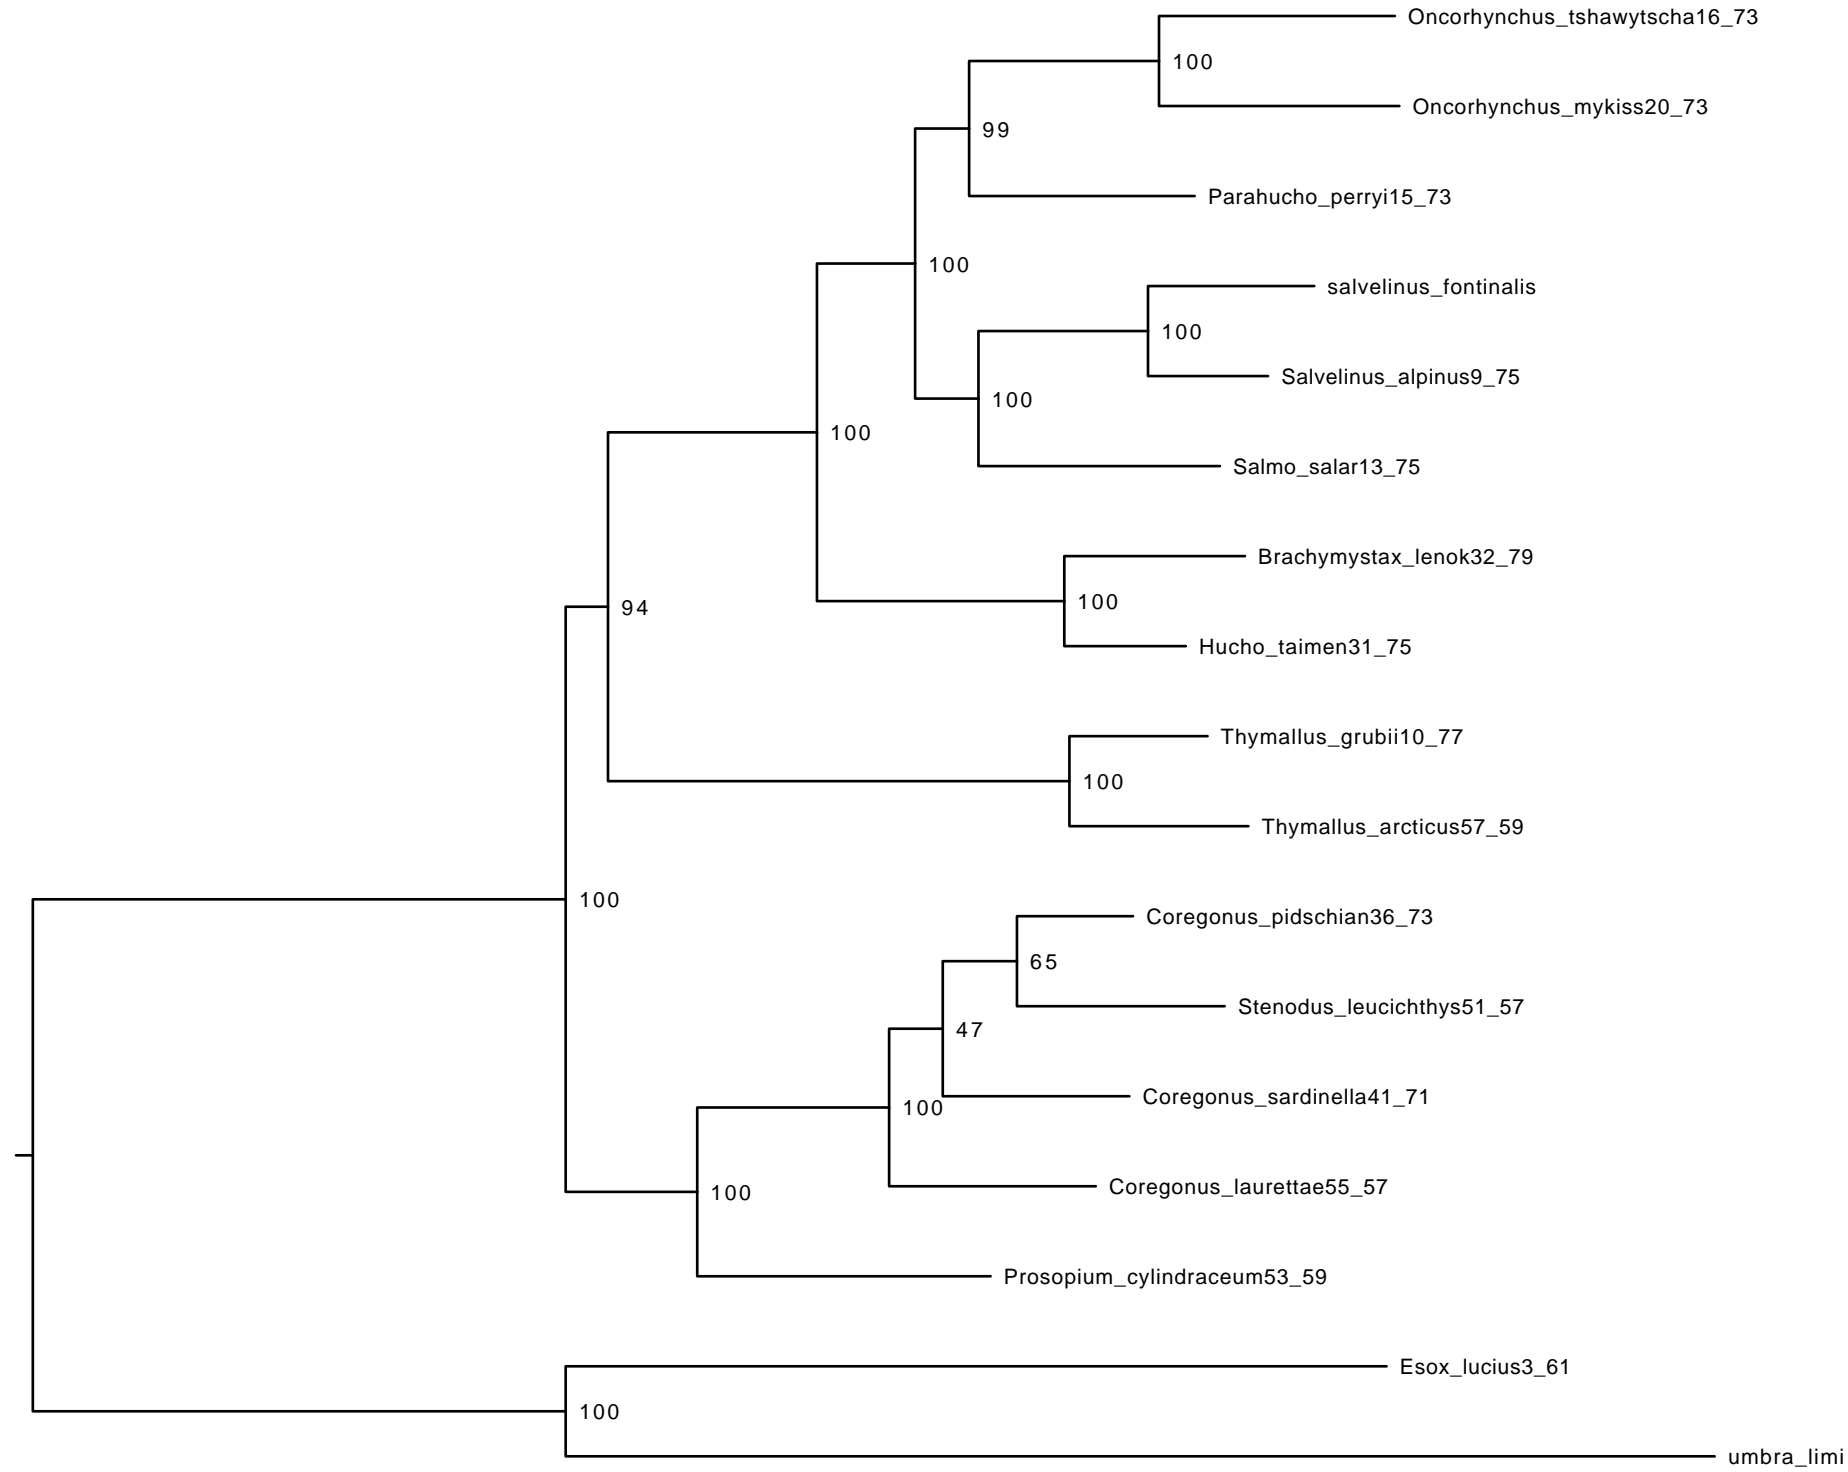

0.01

Supplement: Data_Supplement.zip [file Data_Supplement.zip]

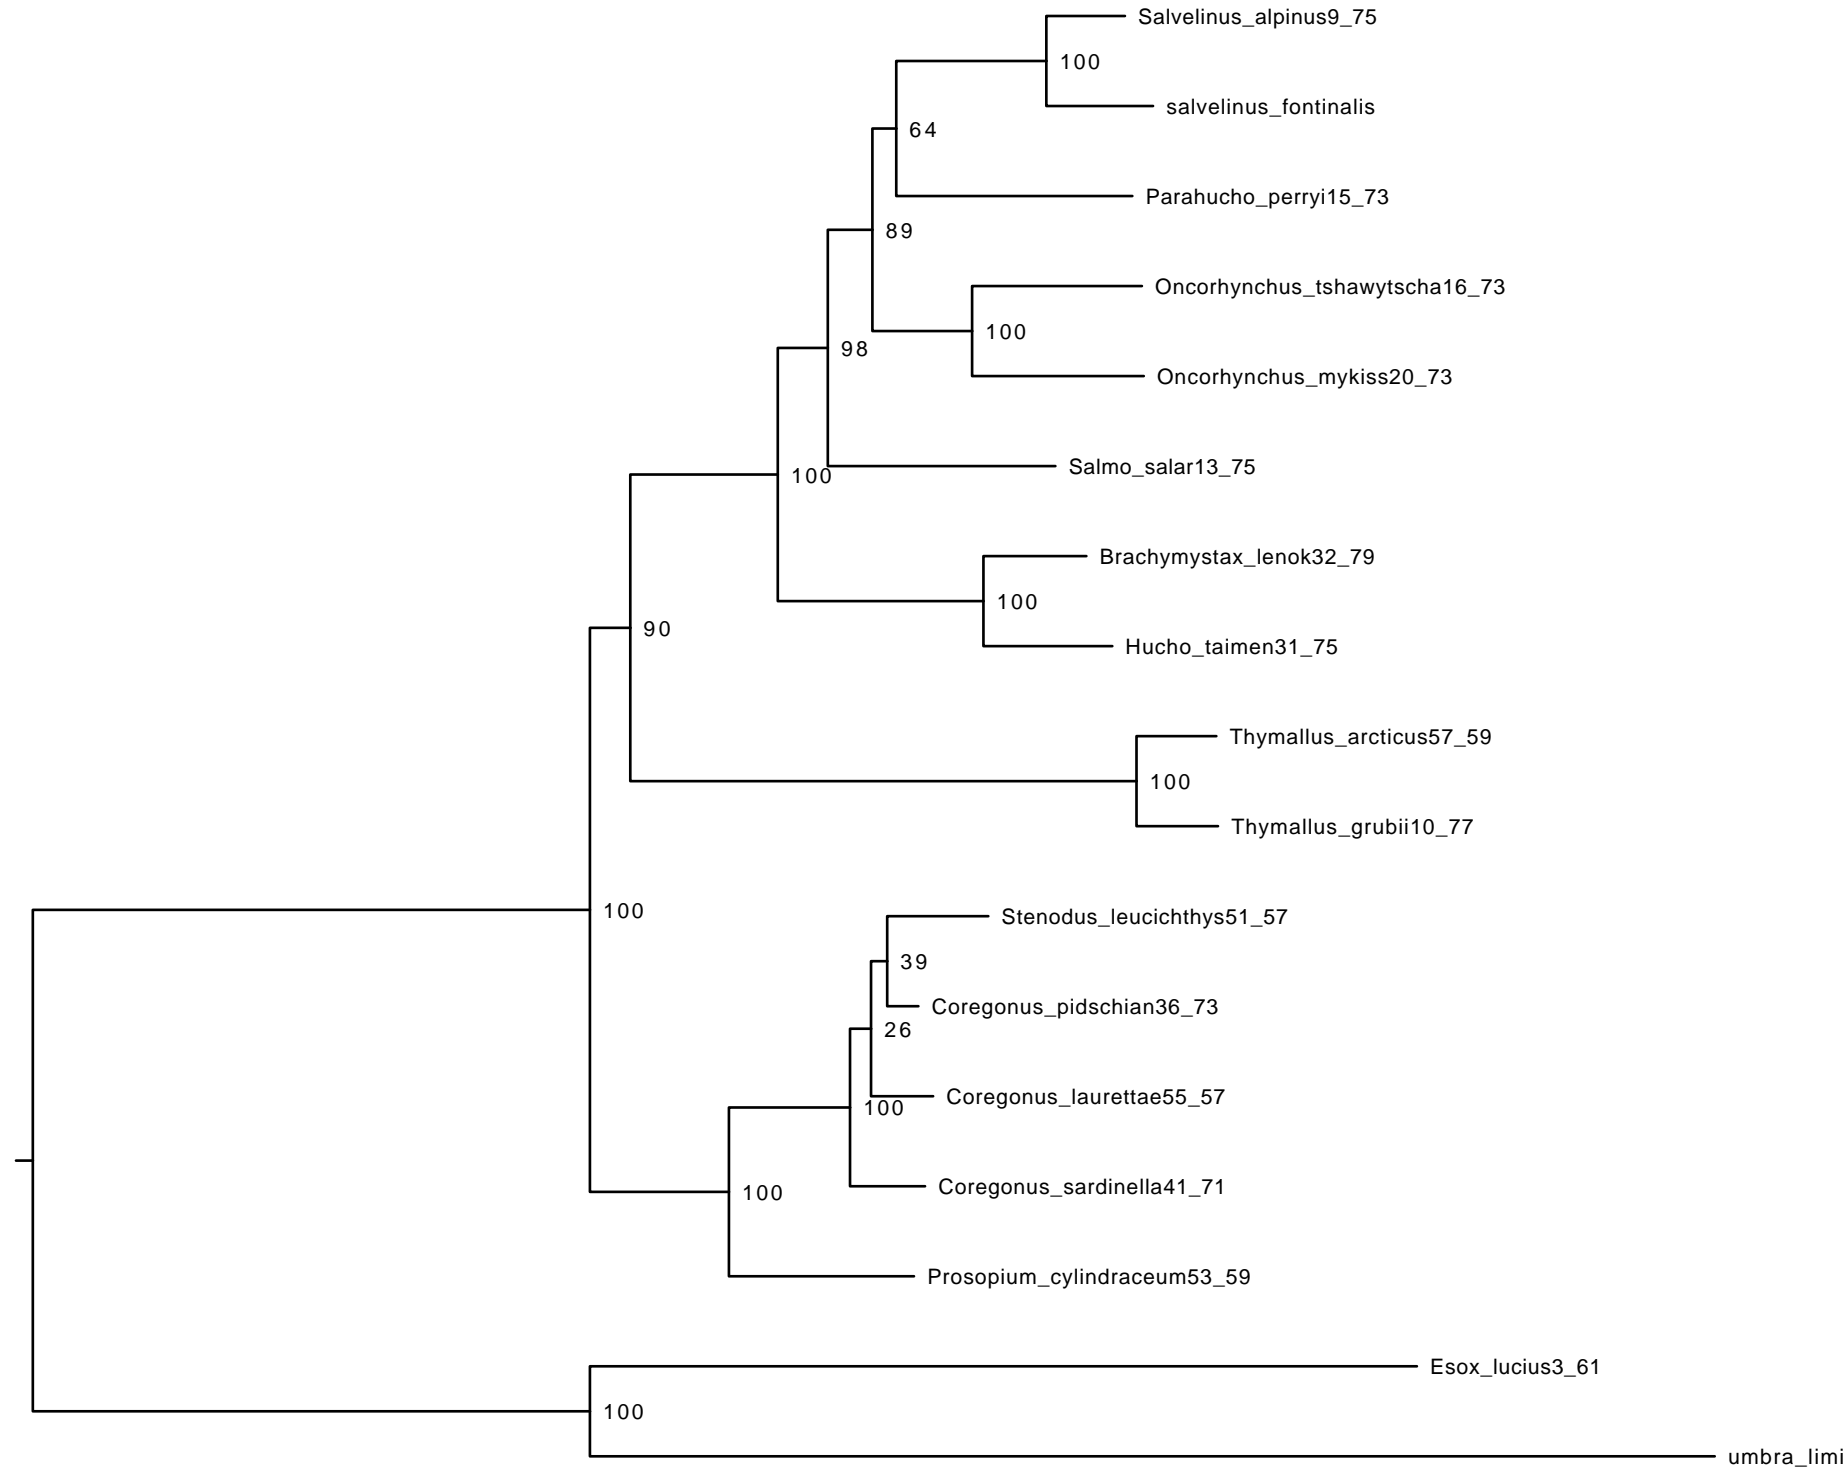

0.0090

Supplement: Data_Supplement.zip [file Data_Supplement.zip]
